# Supplementary material for: Electrochemical annulation of five-membered rings through dearomatization of furans and thiophenes
Source: Royal Society of Chemistry journal article supplement (doi:10.1039/b513532j), 2005-11-16

*Supporting Information for*

**Electrochemical Annulation of Five-Membered Rings Through Dearomatization of Furans and Thiophenes**

*Jeffrey B. Sperry<sup>†</sup>, Ion Ghiviriga<sup>‡</sup> and Dennis L. Wright<sup>\*†</sup>*

<sup>†</sup>Department of Chemistry, Dartmouth College, Hanover, NH 03755

<sup>‡</sup>Department of Chemistry, University of Florida, Gainesville, FL 32611

Table of Contents

|                                                |      |
|------------------------------------------------|------|
| General experimental.....                      | S-2  |
| General cuprate procedure.....                 | S-2  |
| General electrolysis procedure.....            | S-3  |
| General procedure for Fetizon's oxidation..... | S-3  |
| General ozonolysis procedure.....              | S-4  |
| <sup>1</sup> H spectrum of <b>14a</b> .....    | S-10 |
| <sup>13</sup> C spectrum of <b>14a</b> .....   | S-11 |
| <sup>1</sup> H spectrum of <b>15a</b> .....    | S-12 |
| <sup>13</sup> C spectrum of <b>15a</b> .....   | S-13 |
| <sup>1</sup> H spectrum of <b>14b</b> .....    | S-14 |
| <sup>13</sup> C spectrum of <b>14b</b> .....   | S-15 |
| <sup>1</sup> H spectrum of <b>15b</b> .....    | S-16 |
| <sup>13</sup> C spectrum of <b>15b</b> .....   | S-17 |
| <sup>1</sup> H spectrum of <b>14c</b> .....    | S-18 |
| <sup>13</sup> C spectrum of <b>14c</b> .....   | S-19 |
| <sup>1</sup> H spectrum of <b>15c</b> .....    | S-20 |
| <sup>13</sup> C spectrum of <b>15c</b> .....   | S-21 |
| <sup>1</sup> H spectrum of <b>14d</b> .....    | S-22 |
| <sup>13</sup> C spectrum of <b>14d</b> .....   | S-23 |
| <sup>1</sup> H spectrum of <b>15d</b> .....    | S-24 |
| <sup>13</sup> C spectrum of <b>15d</b> .....   | S-25 |
| <sup>1</sup> H spectrum of <b>16</b> .....     | S-26 |
| <sup>13</sup> C spectrum of <b>16</b> .....    | S-27 |
| <sup>1</sup> H spectrum of <b>17</b> .....     | S-28 |
| <sup>13</sup> C spectrum of <b>17</b> .....    | S-29 |
| <sup>1</sup> H spectrum of <b>18</b> .....     | S-30 |
| <sup>13</sup> C spectrum of <b>18</b> .....    | S-31 |
| <sup>1</sup> H spectrum of <b>21</b> .....     | S-32 |
| <sup>13</sup> C spectrum of <b>21</b> .....    | S-33 |
| <sup>1</sup> H spectrum of <b>22</b> .....     | S-34 |
| <sup>13</sup> C spectrum of <b>22</b> .....    | S-35 |
| <sup>1</sup> H spectrum of <b>23</b> .....     | S-36 |
| <sup>13</sup> C spectrum of <b>23</b> .....    | S-37 |

## General Experimental

All reactions were carried out in flame-dried glassware under an atmosphere of argon unless otherwise noted. Tetrahydrofuran was freshly distilled from Na/benzophenone. Mixtures of TMSCl and Et<sub>3</sub>N refer to the supernatant liquid from a centrifuged 1:1 v:v solution made in a flame dried distillation receiver under argon. These solutions can be kept up to 3 days in a -20°C freezer. Commercially available enones *must be* distilled prior to use and kept in a freezer under an atmosphere of argon. Copper (I) iodide was either purchased at 99.99% purity (Aldrich) or purified by Soxhlet extraction with CH<sub>2</sub>Cl<sub>2</sub>. Electrolysis reactions were carried out as previously reported (see ref. 2) with alternating stainless steel cathodes and carbon anodes. No attempts were made to exclude air or water from these reactions. NMR spectra were obtained either on a Bruker 300 or a Varian Inova 500. Elemental analyses were performed by Atlantic Microlab, Inc. and high-resolution mass spectra were obtained from the Washington University Resource for Biomedical and Bio-organic Mass Spectrometry.

### General cuprate procedure:

A solution of 2-(2-furyl)-ethyl bromide (**2b**) (1.0g, 5.7 mmol) in THF (5.5 mL) was purged with argon for 10 min. This solution was then added to a flask containing Mg turnings (0.137 g, 5.7 mmol). After 2.5 h the majority of the Mg had dissolved and a clear dark solution had formed. The solution was cooled to 0°C and CuI (0.165 g, 0.87mmol) was added. After stirring for 5 min the turbid black solution was cooled to -78°C. A mixture of TMSCl:Et<sub>3</sub>N (5.5 mL) was added, followed by N,N,N,N-tetramethylethylenediamine (0.90mL, 5.5 mmol). Next, the addition of the enone (4.5 mmol) produced a bright yellow solution. The mixture was allowed to warm to ambient temperature over 5 h and then placed in the refrigerator overnight. The black mixture was then poured into an ice-cold mixture of pentane (100 mL) and saturated aqueous NH<sub>4</sub>Cl (50 mL). The pentane layer was separated and washed

with NaHCO<sub>3</sub>, then brine, and dried over Na<sub>2</sub>SO<sub>4</sub>. Removal of solvent provided the crude enolether as a pale yellow oil.

### **General electrolysis procedure**

A 50-mL beaker was charged with the crude enolether (0.69 mmol) and 34.5 mL of an electrolyte solution (4:1 CH<sub>3</sub>CN:2-propanol, 0.1M LiClO<sub>4</sub>, and 0.08M 2,6-lutidine) and stirred until homogeneous. An electrode system consisting of alternating plates of carbon (anode) and steel (cathode) was inserted and charged with a constant current of 22.0 mA (current density = 1mA/cm<sup>2</sup>). The reaction was monitored by TLC every 30 minutes until complete. Once complete, the volatiles were removed under vacuum, and the crude material was dissolved in ether (40 mL) and washed with 1 M HCl (15 mL). The aqueous phase was extracted with Et<sub>2</sub>O (2x25 mL), and the combined organic phases were washed with water, NaHCO<sub>3</sub>, brine and dried over Na<sub>2</sub>SO<sub>4</sub>. The crude material was concentrated *in vacuo* and chromatographed *through degassed silica gel* to provide the desired compounds. Typical amounts of charged passed ranged from 2.1-2.3 F/mol.

In order to isolate spirocyclic ketals, the crude product after electrolysis was concentrated, then taken up in ether and washed with water (3x20 mL). The combined aqueous layers were extracted with ether (2x20 mL) and the combined organic layers were washed with NaHCO<sub>3</sub> (20 mL) and brine (20 mL) and dried over Na<sub>2</sub>SO<sub>4</sub>. The crude material was concentrated *in vacuo* and chromatographed (10:1 hexanes: ethyl acetate) *through degassed silica gel* to provide the desired compounds as viscous oils. Reported ratios are isolated ratios after column chromatography and all coincide with ratios obtained from GC/MS analysis.

### **General procedure for oxidations with Fetizon's reagent (Ag<sub>2</sub>CO<sub>3</sub>/Celite)**

Hydrolysis of spirocyclic ketals was first accomplished by dissolving 50mg of **14a** in 3 mL of ether followed by addition to 5 mL of 1M HCl with vigorous stirring. The hydrolysis was monitored by

TLC until complete consumption of starting material was achieved (typical reaction times depended on isomer but ranged from 2 hours to 8 hours). Once complete, the aqueous layer was extracted twice with ethyl acetate (10 mL) and the combined organic layers were washed with NaHCO<sub>3</sub> (10 mL) and brine (10 mL) and dried over Na<sub>2</sub>SO<sub>4</sub>. After concentration, the crude lactols, isolated as yellowish solids, were taken forward without the benefit of further purification.

The crude lactol mixtures were first dissolved in 4 mL of degassed benzene and 200 mg of Fetizon's reagent (Ag<sub>2</sub>CO<sub>3</sub>/Celite, Aldrich) was added. The mixture was refluxed under argon until black. The reaction was checked by TLC until complete, but was generally finished once the color changed. The crude reaction mixture was diluted with 5 mL of ether and filtered through a 3 inch plug of celite and silica gel. The plug was washed with an additional 25 mL of ether and the combined organics concentrated to provide either **16** or **17** as white solids (79% and 80%, respectively) that were fully characterized without purification.

#### **General ozonolysis procedure**

A crude mixture of lactols (from hydrolysis of **15a**) were dissolved in CH<sub>2</sub>Cl<sub>2</sub> and cooled to -78°C. Ozone was passed until a blue color persisted (typical reaction time 2-5 minutes). The solution was purged with nitrogen for 10 minutes and 0.5 mL of Me<sub>2</sub>S was added. The reaction was stirred at -78°C for 30 minutes and allowed to warm to ambient temperature. The reaction continued to stir for 4 hours and concentrated *in vacuo*. Chromatography provided **18** as a colorless oil.

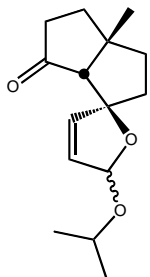

**5'-isopropoxy-1-methyl-spiro[2'-oxo-bicyclo[3.3.0]octan-6-one-*R*\*-4,2'-cyclopent-3'-ene] (15a)**

Isolated as a colorless oil. IR (neat)  $\nu_{\max}$  3088, 2970, 2877, 1734, 1455, 1372  $\text{cm}^{-1}$ ;  $^1\text{H}$  NMR (500 MHz)  $\delta$  (mixture) 6.23 (dd,  $J=5.9$  Hz, 1.2 Hz, 1H), 6.18 (dd,  $J=5.9$  Hz, 1.0 Hz, 1H), 5.83-5.85 (m, 1H), 5.79-5.81 (m, 1H), 3.94 (septet,  $J=6.1$  Hz, 1H), 3.93 (septet,  $J=6.1$  Hz, 1H), 2.26-2.42 (m, 2H), 2.21 (s, 1H), 1.96-2.10 (m, 2H), 1.82-1.94 (m, 2H), 1.71-1.80 (m, 2H), 1.41 (s, 3H), 1.40 (s, 3H), 1.23 (d,  $J=6.1$  Hz, 3H), 1.20 (d,  $J=6.3$  Hz, 3H), 1.17 (d,  $J=6.3$  Hz, 3H), 1.16 (d,  $J=6.1$  Hz, 3H);  $^{13}\text{C}$  NMR (125 MHz)  $\delta$  (major isomer) 218.0, 136.7, 128.2, 107.2, 100.0, 70.8, 67.1, 48.4, 41.2, 40.1, 39.8, 35.3, 28.2, 24.0, 22.9; EI-HRMS  $m/z$  calculated for  $\text{C}_{15}\text{H}_{22}\text{O}_3$  ( $\text{M}^+$ ): 250.1569, found: 250.1571.

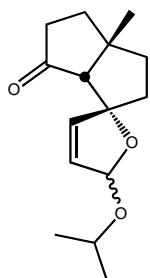

**5'-isopropoxy-1-methyl-spiro[2'-oxo-bicyclo[3.3.0]octan-6-one-*S*\*-4,2'-cyclopent-3'-ene] (15b)**

Isolated as a colorless oil. IR (neat)  $\nu_{\max}$  3088, 2970, 2877, 1734, 1455, 1372  $\text{cm}^{-1}$ ;  $^1\text{H}$  NMR (500 MHz)  $\delta$  6.206 (dd,  $J=5.9$  Hz, 1.2 Hz, 1H), 5.82 (dd,  $J=5.6$  Hz, 1.2 Hz, 1H), 5.70 (dd,  $J=5.6$  Hz, 1.2 Hz, 1H), 3.87 (septet,  $J=6.1$  Hz, 1H), 2.55 (ddd,  $J=17.8$  Hz, 9.0 Hz, 0.98 Hz, 1H), 2.22-2.28 (m, 1H), 2.19 (s, 1H), 2.06-2.12 (m, 2H), 1.95-2.04 (m, 2H), 1.71-1.78 (m, 2H), 1.25 (d,  $J=6.6$  Hz, 3H), 1.20 (s, 3H), 1.14 (d,  $J=6.1$  Hz, 3H);  $^{13}\text{C}$  NMR (125 MHz)  $\delta$  217.9, 136.6, 128.1, 107.1, 100.0, 71.1, 67.0, 48.4, 41.2, 40.0, 39.8, 35.3, 24.0, 22.9, 22.6; EI-HRMS  $m/z$  calculated for  $\text{C}_{15}\text{H}_{22}\text{O}_3$  ( $\text{M}^+$ ): 250.1569, found: 250.1580.

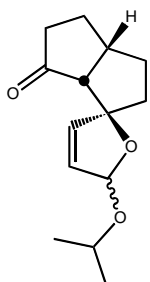

**(1*S*\*)-5'-isopropoxy-spiro[2'-oxo-bicyclo[3.3.0]octan-6-one-*R*\*-4,2'-cyclopent-3'-ene] (16a)** Isolated as a colorless oil (mixture). IR (neat)  $\nu_{\max}$  ( $\text{cm}^{-1}$ ) 3090, 2967, 2877, 1732, 1627, 1455;  $^1\text{H}$  NMR (500 MHz,  $\text{CDCl}_3$ )  $\delta$  6.28 (dd,  $J=5.8$  Hz, 1.0 Hz, 1H), 6.24 (dd,  $J=5.8$  Hz, 1.0 Hz, 1H), 5.86 (dd,  $J=5.8$  Hz, 1.0 Hz, 1H), 5.83 (dd,  $J=5.9$  Hz, 1.3 Hz, 1H), 5.78-5.80 (m, 2H), 3.92 (partial septet,  $J=6.4$  Hz, 2H), 3.08-3.14 (m, 2H), 2.70 (d,  $J=8.0$  Hz, 1H), 2.57 (d,  $J=8.5$  Hz, 1H), 2.30-2.40 (m, 2H), 2.23-2.28 (m, 2H), 2.06-2.14 (m, 1H), 1.84 (ddt,  $J=13.4$  Hz, 7.3 Hz, 1.9 Hz, 1H), 1.70-1.80 (m, 4H), 1.64-1.69 (m,

4H), 1.55-1.64 (m, 2H), 1.22 (d,  $J = 6.3$  Hz, 3H), 1.20 (d,  $J = 6.3$  Hz, 3H), 1.16 (d,  $J = 6.1$  Hz, 3H), 1.15 (d,  $J = 6.1$  Hz, 3H);  $^{13}\text{C}$  NMR (125 MHz)  $\delta$  219.0, 218.4, 135.3, 138.0, 127.5, 127.4, 106.5, 106.1, 98.9, 98.6, 70.6, 70.0, 64.8, 63.4, 40.2, 40.1, 39.9, 39.0, 38.7, 38.3, 31.9, 31.8, 27.9, 27.8, 24.2, 24.1, 22.9, 22.8; HRMS  $m/z$  calculated for  $\text{C}_{14}\text{H}_{20}\text{O}_3$ : 236.1412, found: 236.1410.

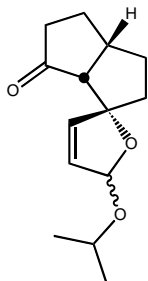

**(1S\*)-5'-isopropoxy-spiro[2'-oxo-bicyclo[3.3.0]octan-6-one-S\*-4,2'-cyclopent-3'-ene] (16b)** Isolated as a colorless oil (one isomer). IR (neat)  $\nu_{\text{max}}$  ( $\text{cm}^{-1}$ ) 3090, 2967, 2877, 1732, 1627, 1455;  $^1\text{H}$  NMR (500 MHz,  $\text{CDCl}_3$ )  $\delta$  6.07 (dd,  $J = 5.6$  Hz, 1.2 Hz, 1H), 5.85 (dd,  $J = 5.6$  Hz, 1.2 Hz, 1H), 5.72 (m, 1H), 3.89 (septet,  $J = 6.1$  Hz, 1H), 2.85-2.94 (m, 1H), 2.61 (d,  $J = 9.8$  Hz, 1H), 2.45-2.54 (m, 1H), 2.06-2.20 (m, 3H), 1.95-1.94 (m, 1H), 1.84-1.91 (m, 3H), 1.22 (d,  $J = 6.4$  Hz, 3H), 1.16 (d,  $J = 6.1$  Hz, 3H);  $^{13}\text{C}$  NMR (125 MHz)  $\delta$  218.4, 136.4, 128.4, 107.2, 99.3, 70.8, 59.3, 42.4, 41.6, 39.7, 32.5, 27.8, 24.0, 22.9; HRMS  $m/z$  calculated for  $\text{C}_{14}\text{H}_{20}\text{O}_3$ : 236.1412, found: 236.1405.

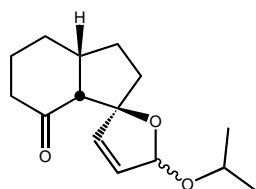

**(1S\*)-5'-isopropoxy-spiro[2'-oxo-bicyclo[4.3.0]nonan-6-one-R\*-4,2'-cyclopent-3'-ene] (17a)** Isolated as a pale-yellow oil mixture, which solidified in a  $-20^\circ\text{C}$  freezer. IR (neat)  $\nu_{\text{max}}$  ( $\text{cm}^{-1}$ ) 3077, 2936, 2866, 1692, 1616, 1566, 1450;  $^1\text{H}$  NMR (500 MHz,  $\text{CDCl}_3$ )  $\delta$  6.78 (dd,  $J = 5.9$  Hz, 1.0 Hz, 1H), 6.57 (dd,  $J = 6.1$  Hz, 1.4 Hz, 1H), 5.72-5.74 (m, 3H), 5.71 (m, 1H), 3.93 (septet,  $J = 6.1$  Hz, 1H), 3.92 (septet,  $J = 6.1$  Hz, 1H), 3.09-3.16 (m, 1H), 2.90-2.98 (m, 1H), 2.83 (d,  $J = 7.3$  Hz, 1H), 2.75 (d,  $J = 7.8$  Hz, 1H), 2.36-2.45 (m, 2H), 2.12-2.23 (m, 2H), 2.06-2.10 (m, 2H), 1.81-1.98 (m, 6H), 1.54-1.71 (m, 4H), 1.41-1.52 (m, 4H), 1.24 (d,  $J = 6.1$  Hz, 3H), 1.21 (d,  $J = 6.1$  Hz, 3H), 1.16 (d,  $J = 6.1$  Hz, 3H), 1.15 (d,  $J = 6.1$  Hz, 3H);  $^{13}\text{C}$  NMR (125 MHz)  $\delta$  212.1, 212.0, 137.4, 136.5, 127.0, 126.4, 105.7, 105.6, 98.2, 97.6, 70.7, 70.3, 66.2, 63.8, 43.2, 42.1, 37.4, 35.1, 27.9, 27.3, 26.6, 26.5, 24.8, 24.6, 24.5, 24.2, 24.1, 24.0, 22.8, 22.7; HRMS  $m/z$  calculated for  $\text{C}_{15}\text{H}_{22}\text{O}_3$ : 250.1569, found: 250.1580.

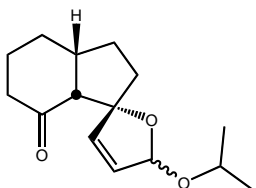

**(1S\*)-5'-isopropoxy-spiro[2'-oxo-bicyclo[4.3.0]nonan-6-one-S\*-4,2'-cyclopent-3'-ene] (17b)** Isolated as a colorless oil, which solidified in a  $-20^\circ\text{C}$  freezer. IR (neat)  $\nu_{\text{max}}$  ( $\text{cm}^{-1}$ ) 3077, 2936, 2866, 1692, 1616, 1566, 1450;  $^1\text{H}$  NMR (500 MHz,  $\text{CDCl}_3$ )  $\delta$  6.05 (dd,  $J = 5.9$  Hz, 1.0 Hz, 1H), 5.76 (dd,  $J = 5.9$  Hz, 1.0 Hz, 1H), 5.64 (s, 1H), 3.89 (septet,  $J = 6.1$  Hz, 1H), 2.59 (d,  $J = 8.8$  Hz, 1H), 2.45-2.52 (m, 1H), 2.28-2.40 (m, 2H), 1.90-2.05 (m, 4H), 1.75-1.86 (m, 3H), 1.57-1.65 (m, 1H), 1.24 (d,  $J = 6.4$  Hz,

3H), 1.16 (d,  $J = 6.1$  Hz, 3H);  $^{13}\text{C}$  NMR (125 MHz)  $\delta$  212.1, 137.3, 127.3, 107.2, 100.0, 70.8, 60.0, 41.5, 39.2, 31.3, 29.6, 26.6, 24.1, 23.6, 22.9; HRMS  $m/z$  calculated for  $\text{C}_{15}\text{H}_{22}\text{O}_3$ : 250.1569, found: 250.1577.

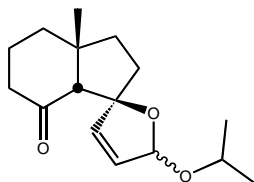

**5'-isopropoxy-( $S^*$ )-1-methyl-spiro[2'-oxo-bicyclo[4.3.0]nonan-6-one-( $S^*$ )-4,2'-cyclopent-3'-ene]**

**(18a)** Isolated as a colorless oil, which solidified in a  $-20^\circ\text{C}$  freezer. IR (neat)  $\nu_{\text{max}}$  3089, 2960, 2866, 1700, 1622,  $1461\text{cm}^{-1}$ ;  $^1\text{H}$  NMR (500 MHz,  $\text{CDCl}_3$ )  $\delta$  6.04 (dd,  $J = 5.9$  Hz, 1.2 Hz, 1H), 5.75 (dd,  $J = 5.9$  Hz, 1.2 Hz, 1H), 5.62 (m, 1H), 3.89 (septet,  $J = 6.3$  Hz, 1H), 2.44 (ddd,  $J = 16.1$  Hz, 13.1 Hz, 6.4 Hz, 1H), 2.28 (s, 1H), 2.20-2.25 (m, 1H), 1.95-2.05 (m, 4H), 1.85-1.90 (m, 1H), 1.75-1.81 (m, 1H), 1.55-1.60 (m, 1H), 1.46-1.50 (m, 1H), 1.24 (d, 6.1 Hz, 3H), 1.16 (d,  $J = 6.1$  Hz, 3H), 1.10 (s, 3H);  $^{13}\text{C}$  NMR (125 MHz)  $\delta$  212.4, 137.5, 127.1, 107.1, 100.7, 70.9, 67.4, 44.4, 41.0, 40.0, 39.1, 35.2, 28.8, 24.1, 22.9, 21.0; HRMS  $m/z$  calculated for  $\text{C}_{16}\text{H}_{24}\text{O}_3$ : 264.1725, found: 264.1731.

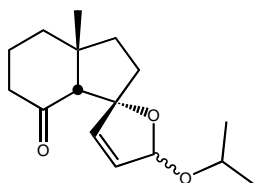

**5'-isopropoxy-( $S^*$ )-1-methyl-spiro[2'-oxo-bicyclo[4.3.0]nonan-6-one-( $S^*$ )-4,2'-cyclopent-3'-ene]**

**(18b)** Isolated as a pale-yellow oil mixture, which solidified in a  $-20^\circ\text{C}$  freezer. IR (neat)  $\nu_{\text{max}}$  3089, 2960, 2866, 1700, 1622,  $1461\text{cm}^{-1}$ ;  $^1\text{H}$  NMR (500 MHz,  $\text{CDCl}_3$ )  $\delta$  (major) 6.15 (dd,  $J = 5.9$  Hz, 1.2 Hz, 1H), 5.81 (m, 1H), 5.78 (dd,  $J = 5.9$  Hz, 1.2 Hz, 1H), 3.97 (septet,  $J = 6.1$  Hz, 1H), 2.71 (s, 1H), 2.60 (ddd,  $J = 16.1$  Hz, 11.7 Hz, 6.6 Hz, 1H), 2.31-2.37 (m, 1H), 2.04-2.16 (m, 2H), 1.90-2.01 (m, 2H), 1.75-1.86 (m, 1H), 1.60-1.72 (m, 2H), 1.48-1.54 (m, 1H), 1.24 (d,  $J = 6.3$  Hz, 3H), 1.20 (s, 3H), 1.17 d,  $J = 6.3$  Hz, 3H);  $^{13}\text{C}$  NMR (125 MHz)  $\delta$  212.1, 135.6, 127.9, 105.7, 99.6, 70.6, 68.5, 44.6, 40.5, 39.4, 38.9, 34.3, 28.2, 24.1, 22.7, 21.4; HRMS  $m/z$  calculated for  $\text{C}_{16}\text{H}_{24}\text{O}_3$ : 264.1725, found: 264.1732.

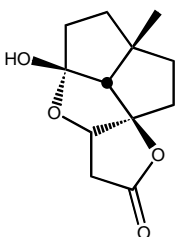

**Hydrate (16)** Isolated as a white solid (m.p.  $124.5$ - $125.1$   $^\circ\text{C}$ ). IR ( $\text{CCl}_4$ ): 3409, 2951, 2867, 2380,  $1775\text{cm}^{-1}$ .  $^1\text{H}$  NMR (500 MHz,  $\text{CDCl}_3$ )  $\delta$  4.43 (dd,  $J = 6.8$ , 2.4 Hz, 1H), 3.89 (s, 1H), 2.90 (dd,  $J = 18.5$ , 2.4 Hz, 1H), 2.82 (dd,  $J = 18.8$ , 6.8 Hz, 1H), 2.48 (s, 1H), 2.22 (ddd,  $J = 24.4$ , 8.3, 2.6 Hz, 1H), 2.03 (m, 2H), 1.94 (ddd,  $J = 13.4$ , 6.1, 3.4 Hz, 1H), 1.60-1.80, (m, 4H), 1.27 (s, 3H);  $^{13}\text{C}$  NMR (125 MHz)  $\delta$  175.7, 119.1, 102.6, 81.6, 70.0, 49.8, 38.0, 37.9, 37.2, 36.7, 34.9, 27.6; Anal. Calcd. for  $\text{C}_{12}\text{H}_{16}\text{O}_4$ : C, 64.27; H, 7.19; O, 28.54. Found: C, 64.05; H, 7.23; O, 28.26.

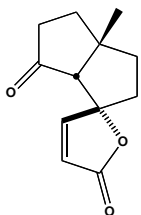

**1-methyl-spiro[2'-oxo-bicyclo[3.3.0]octan-6-one-S\*-4,2'-cyclopent-3'-ene-5'-one] (17)** Isolated as a white solid (m.p 134.1-135.1 °C). IR (CCl<sub>4</sub>): 2952, 2866, 1761, 1737. <sup>1</sup>H NMR (500 MHz, CDCl<sub>3</sub>) δ 7.37 (d, *J*=5.6Hz, 1H), 6.12 (d, *J*=5.6Hz, 1H), 2.60 (ddd, *J*=18.3Hz, 9.0Hz, 6.6Hz, 1H), 2.45 (s, 3H), 2.31-2.38 (m, 1H), 2.16 -2.28 (m, 3H), 1.85-1.96 (m, 1H), 1.93-2.02 (m, 2H), 1.31 (s, 1H); <sup>13</sup>C NMR (125 MHz) δ 214.3, 171.6, 157.1, 122.0, 96.9, 65.3, 48.9, 39.9, 39.7, 38.9, 35.6, 28.3. Anal. Calcd. for C<sub>12</sub>H<sub>14</sub>O<sub>3</sub>: C, 69.88; H, 6.84; O, 23.27. Found: C, 69.65; H, 6.84; O, 23.29.

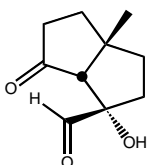

**1-hydroxy-3a-methyl-6-oxo-octahydro-pentalene-1-carbaldehyde (18)** Isolated as a colorless oil. IR (neat)  $\nu_{\max}$  3399, 2944, 2870, 1751, 1715, 1642cm<sup>-1</sup>; <sup>1</sup>H NMR (500 MHz) δ 9.53 (s, 1H), 3.60 (s, 1H), 2.47-2.53 (m, 2H), 2.35-2.42 (m, 1H), 2.06-2.20 (m, 3H), 1.80-1.90 (m, 3H), 1.30 (s, 3H); <sup>13</sup>C NMR (125 MHz) δ 217.9, 200.3, 87.4, 64.6, 49.1, 40.0, 39.0, 36.9, 34.8, 27.5; EI-HRMS *m/z* calculated for C<sub>10</sub>H<sub>14</sub>O<sub>3</sub> (M<sup>+</sup>): 182.0943, found: 182.0951.

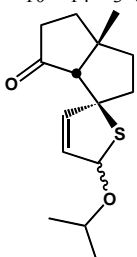

**5'-isopropoxy-(S\*)-1-methyl-spiro[2'-thia-bicyclo[3.3.0]octan-6-one-(R\*)-4,2'-cyclopent-3'-ene] (21)** Isolated as a pale yellow oil. IR (neat)  $\nu_{\max}$ : 3054, 2944, 2859, 1732, 1452; <sup>1</sup>H NMR (500 MHz, CDCl<sub>3</sub>) δ (mixture) 6.13 (dd, *J*= 1.2 Hz, 0.9 Hz, 1H), 6.08 (dd, *J*= 1.2 Hz, 0.9 Hz, 1H), 6.04 (d, *J*= 6.3 Hz, 1H), 6.02 (d, *J*= 6.3 Hz, 1H), 5.89 (ddd, *J*= 6.3 Hz, 2.4 Hz, 0.9 Hz, 1H), 5.86 (ddd, *J*= 6.2 Hz, 2.4 Hz, 0.9 Hz, 1H), 3.78 (septet, *J*= 6.3 Hz, 1H), 3.75 (septet, *J*= 6.1 Hz, 1H), 2.59 (s, 1H), 2.41 (s, 1H), 2.25-2.35 (m, 4H), 1.95-2.05 (m, 4H), 1.86-1.93 (m, 4H), 1.75-1.83 (m, 4H), 1.39 (s, 3H), 1.37 (s, 3H), 1.15-1.20 (m, 12H); <sup>13</sup>C NMR (125 MHz) δ (mixture) 21.6, 21.7, 23.1, 23.5, 27.8, 28.7, 36.4, 36.6, 40.0, 40.2, 41.1, 41.3, 44.6, 45.2, 48.1, 48.4, 68.3, 69.3, 70.3, 70.9, 72.3, 72.6, 91.9, 92.0, 130.1, 130.6, 139.3, 140.2, 215.4, 217.2; EI-HRMS *m/z* calculated for C<sub>15</sub>H<sub>22</sub>O<sub>2</sub>S (M<sup>+</sup>): 266.1341, found: 266.1334.



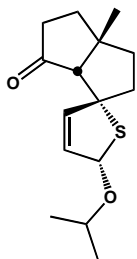

**5'-isopropoxy-(S\*)-1-methyl-spiro[2'-thia-bicyclo[3.3.0]octan-6-one-(S\*)-4,2'-cyclopent-3'-ene] (22)** Isolated as a pale yellow oil. IR (neat)  $\nu_{\max}$ :  $^1\text{H}$  NMR (500 MHz,  $\text{CDCl}_3$ )  $\delta$  (mixture) 6.09 (dd,  $J=1.2$  Hz, 0.9 Hz, 1H), 6.07, (dd,  $J=1.2$  Hz, 0.9 Hz, 1H), 5.95-6.02 (m, 2H), 5.81-5.89 (m, 2H), 3.70 (septet,  $J=6.1$  Hz, 1H), 3.45 (septet,  $J=6.1$  Hz, 1H), 2.42-2.52 (m, 4H), 2.20-2.32 (m, 4H), 1.94-2.02 (m, 4H), 1.78-1.88 (m, 4H), 1.23 (s, 3H), 1.19 (d,  $J=6.1$  Hz, 3H), 1.13 (s, 3H), 1.09 (d,  $J=6.1$  Hz, 3H);  $^{13}\text{C}$  NMR (125 MHz)  $\delta$  (mixture) 21.9, 22.1, 23.3, 23.6, 27.1, 28.9, 36.5, 36.6, 41.0, 41.2, 42.1, 42.4, 44.3, 45.2, 48.5, 48.6, 68.5, 69.4, 70.8, 70.9, 72.1, 72.7, 92.0, 92.3, 130.2, 130.5, 139.7, 140.2, 215.3, 217.8; EI-HRMS  $m/z$  calculated for  $\text{C}_{15}\text{H}_{22}\text{O}_2\text{S}$  ( $\text{M}^+$ ): 266.1341, found: 266.1340.

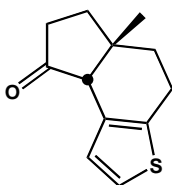

**5a-methyl-4,5,5a,6,7,8a-hexahydro-3-thia-as-indacen-8-one (23)** Isolated as a white solid (m.p. 61.2-61.7°C).  $^1\text{H}$  NMR (500 MHz, toluene- $d_8$ )  $\delta$  7.28 (d,  $J=1.7$  Hz, 1H), 6.18 (d,  $J=1.7$  Hz, 1H), 3.37 (s, 1H), 2.49-2.55 (m, 1H), 2.43 (ddd,  $J=8.7\text{Hz}, 2.7\text{Hz}, 1.0\text{Hz}$ , 1H), 2.41 (dd,  $J=10.6\text{Hz}, 8.4\text{Hz}$ , 1H), 2.31-2.36 (m, 1H), 1.84-1.99 (m, 2H), 1.70-1.72 (m, 4H), 1.27 (s, 3H);  $^{13}\text{C}$  NMR (125 MHz)  $\delta$  21.8, 25.1, 31.5, 33.1, 35.2, 38.2, 56.2, 122.3, 128.3, 130.6, 134.7, 215.3; Anal. Calcd for  $\text{C}_{12}\text{H}_{14}\text{OS}$ : C, 69.86; H, 6.84; O, 7.76; S, 15.54. Found: C, 69.85; H, 6.77; O, 7.53; S, 15.37.

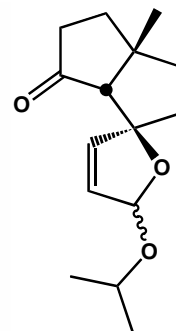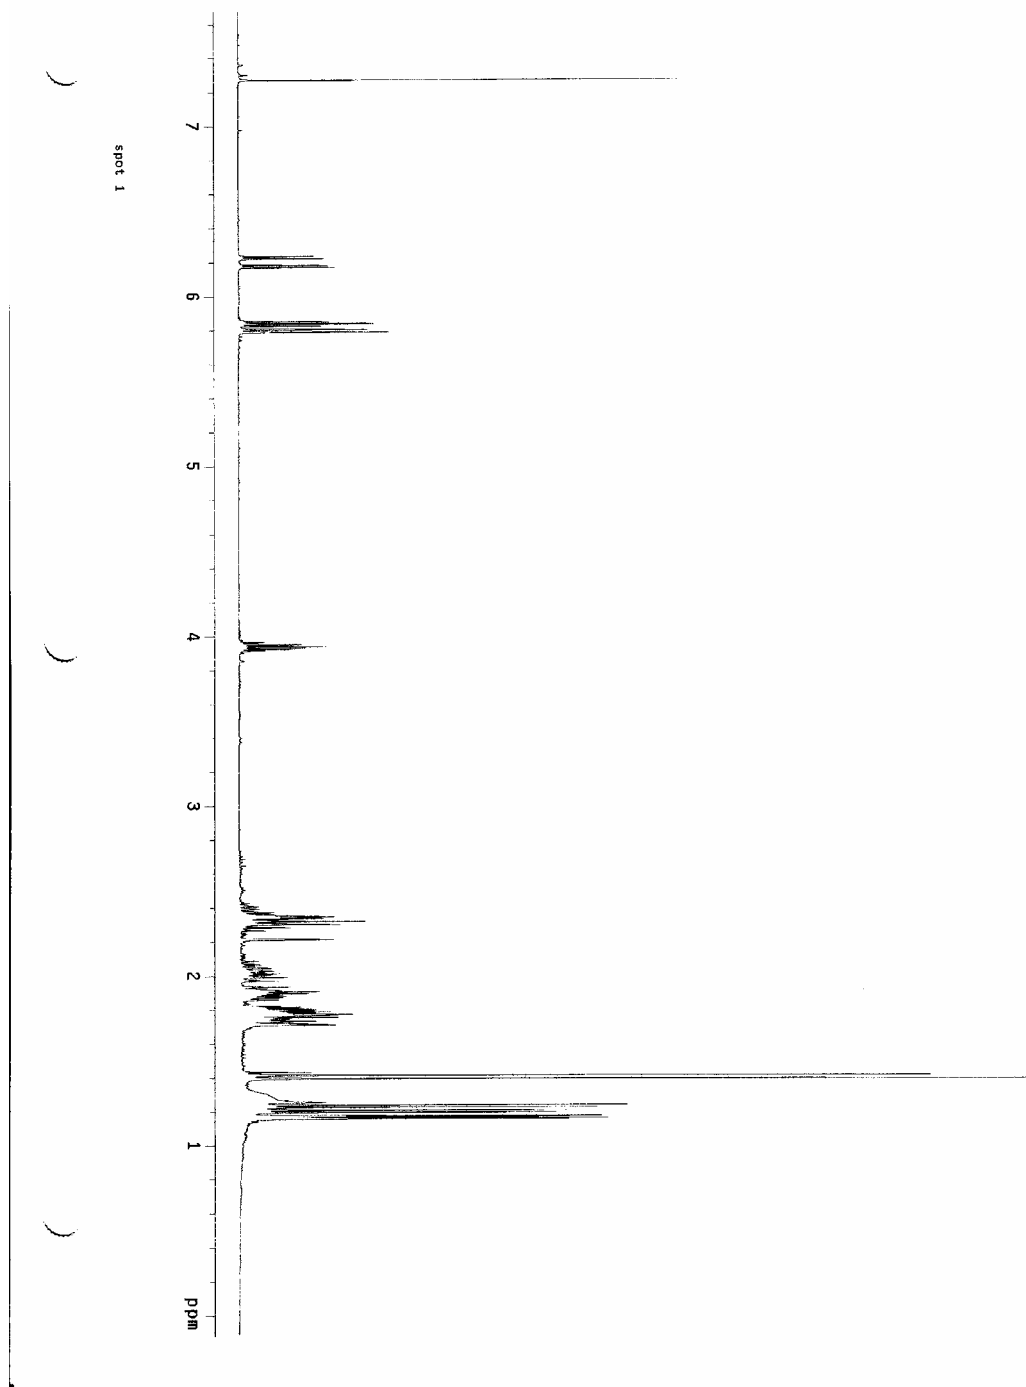

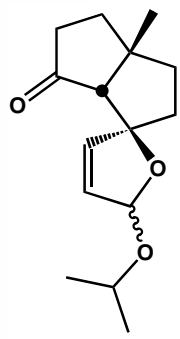

STANDARD CARBON PARAMETERS  
Unit: ppm

| Atom | Chemical Shift (ppm) | Assignment |
|------|----------------------|------------|
| 1    | 170                  | Carbonyl   |
| 2    | 135                  | Furan C2   |
| 3    | 125                  | Furan C3   |
| 4    | 115                  | Furan C4   |
| 5    | 105                  | Furan C5   |
| 6    | 75                   | CH-O       |
| 7    | 65                   | CH2-O      |
| 8    | 35                   | CH3        |
| 9    | 30                   | CH3        |
| 10   | 25                   | CH3        |

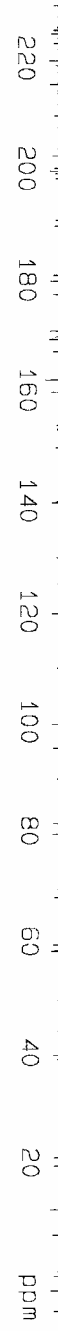

STANDARD CARBON PARAMETERS

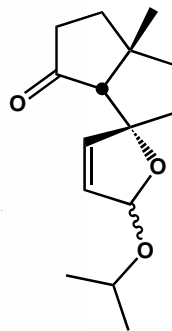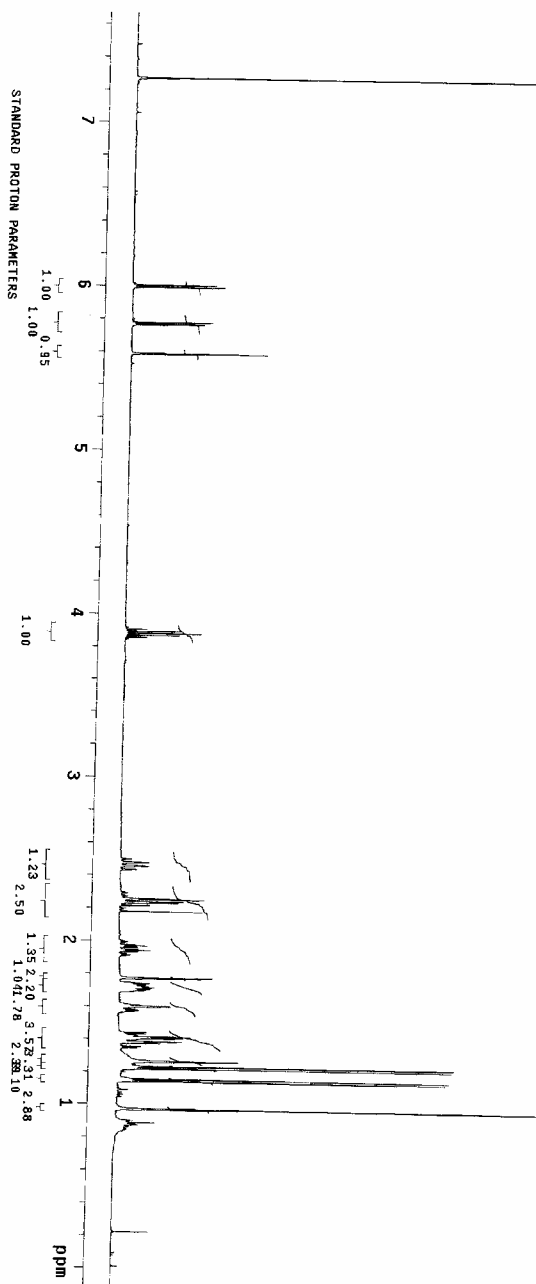

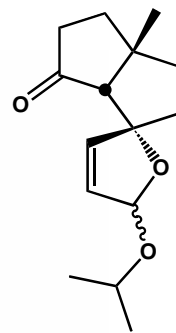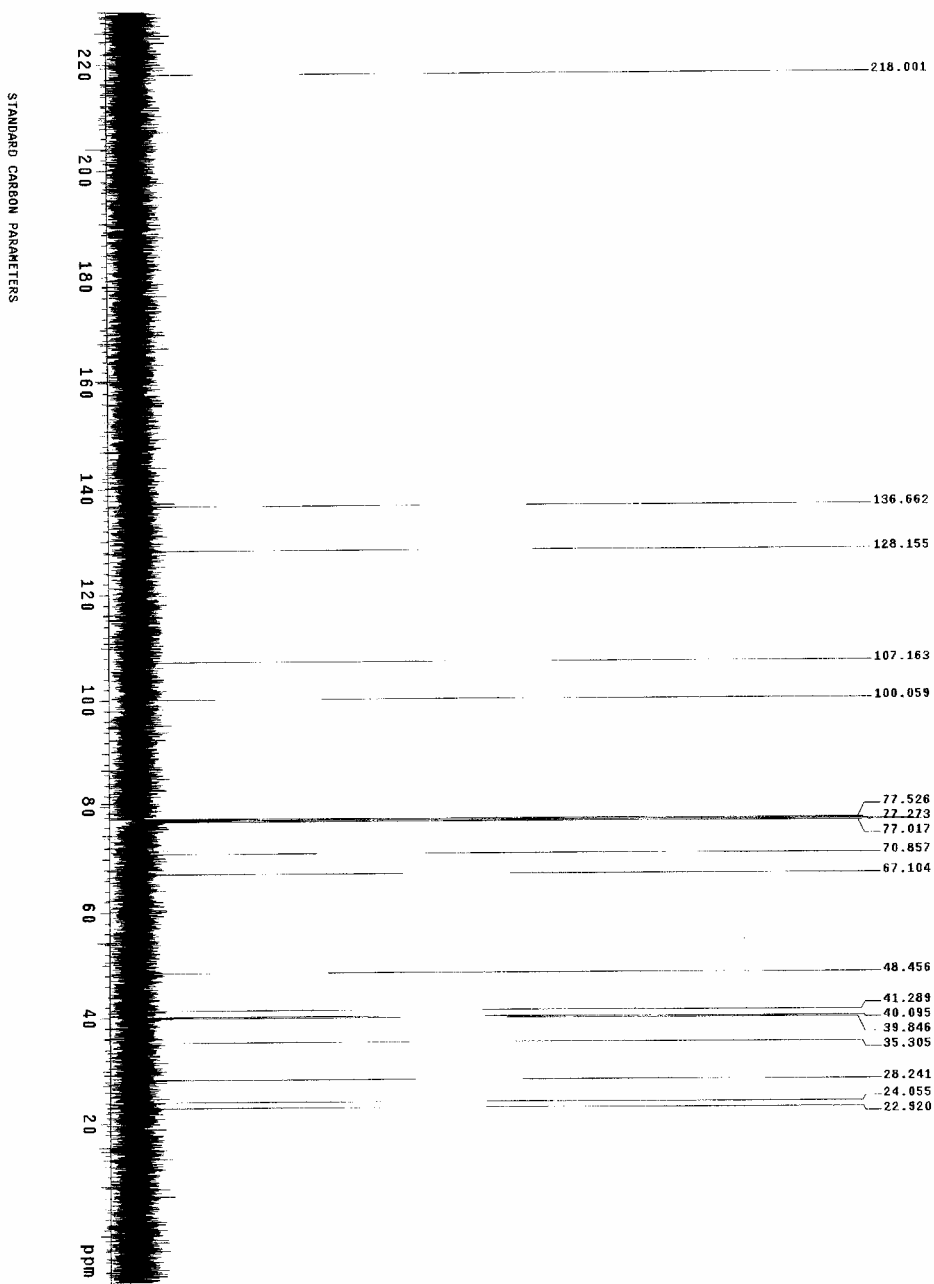

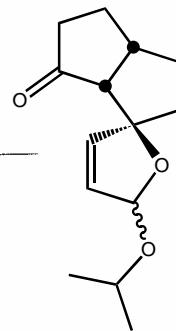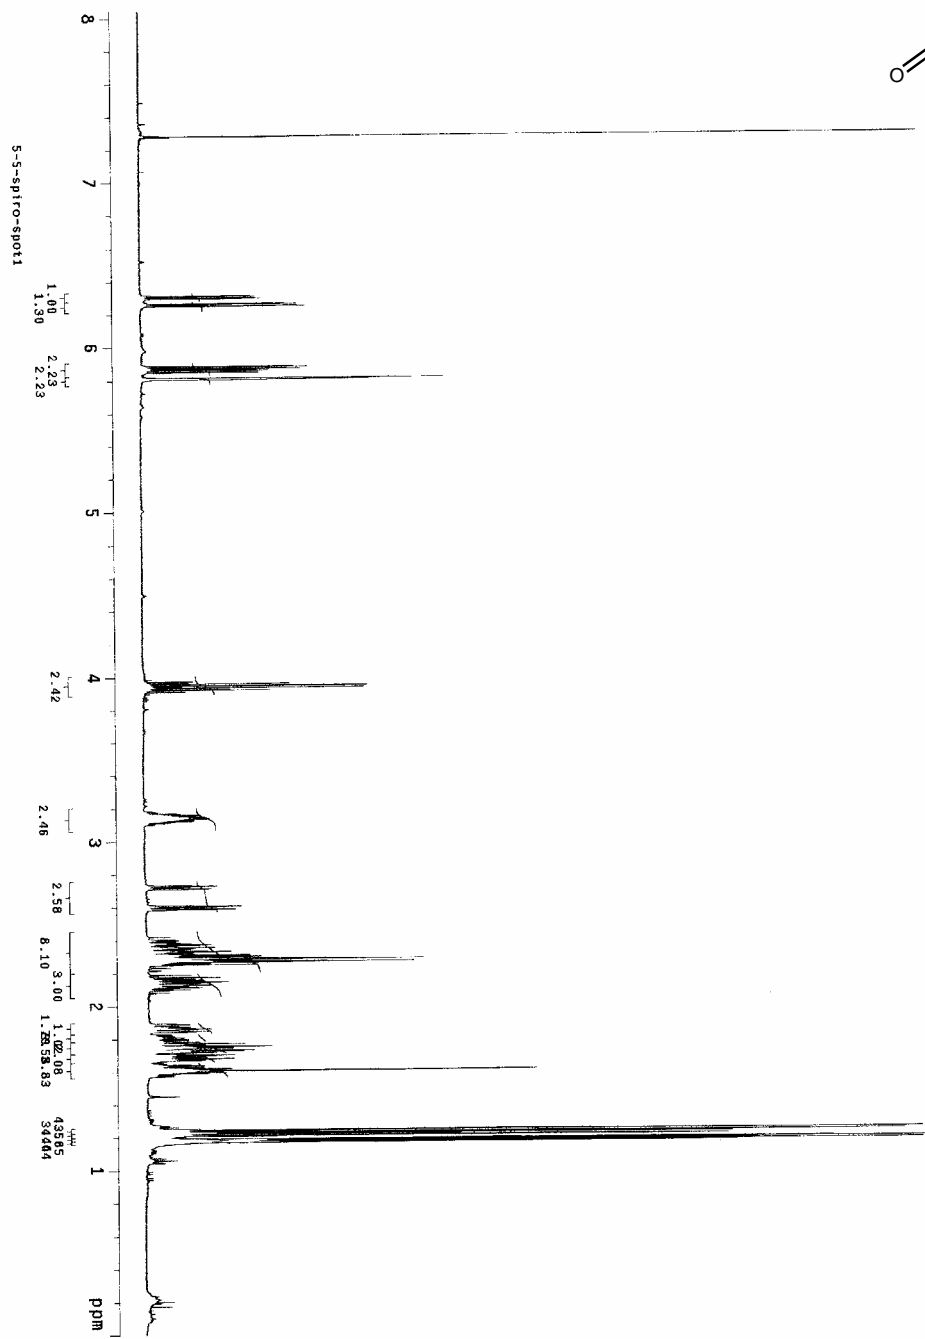

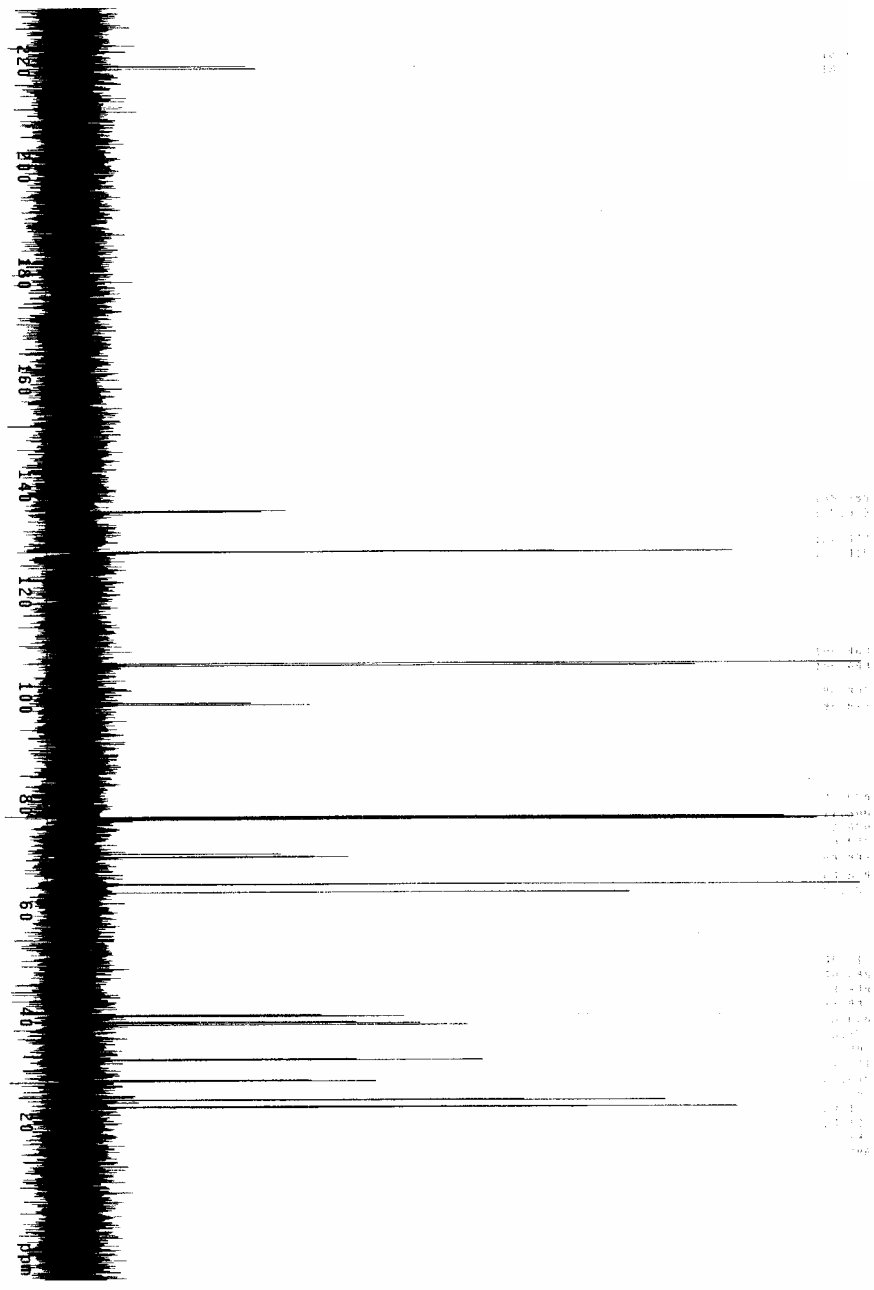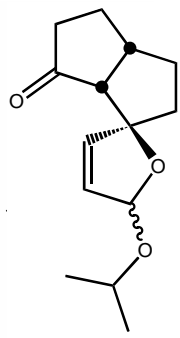

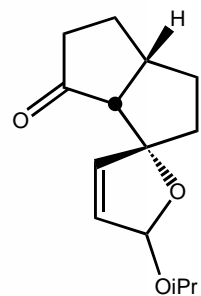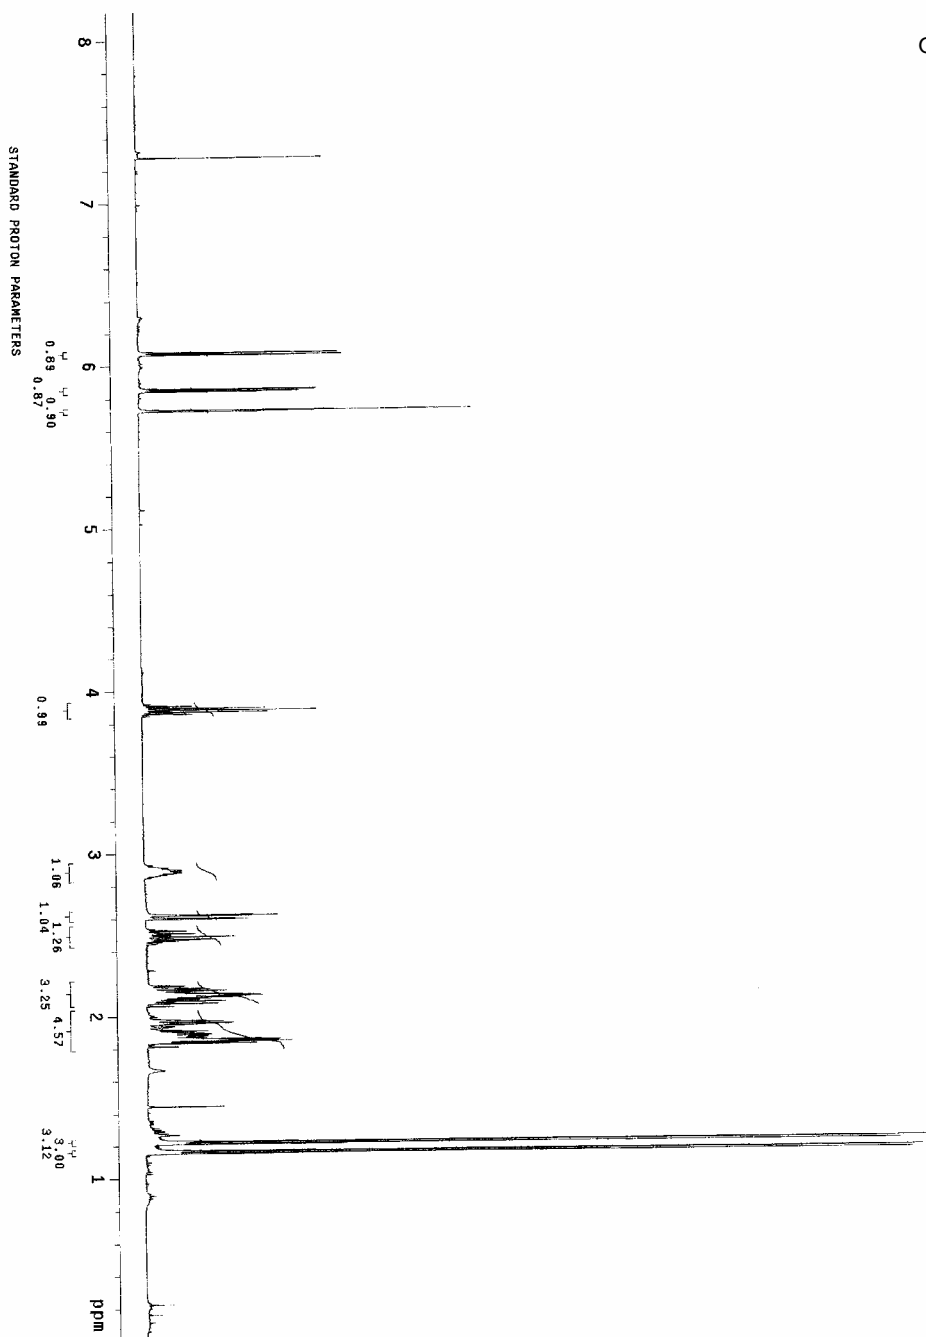



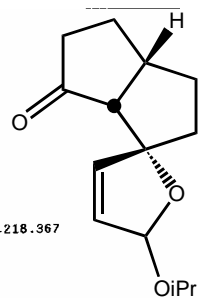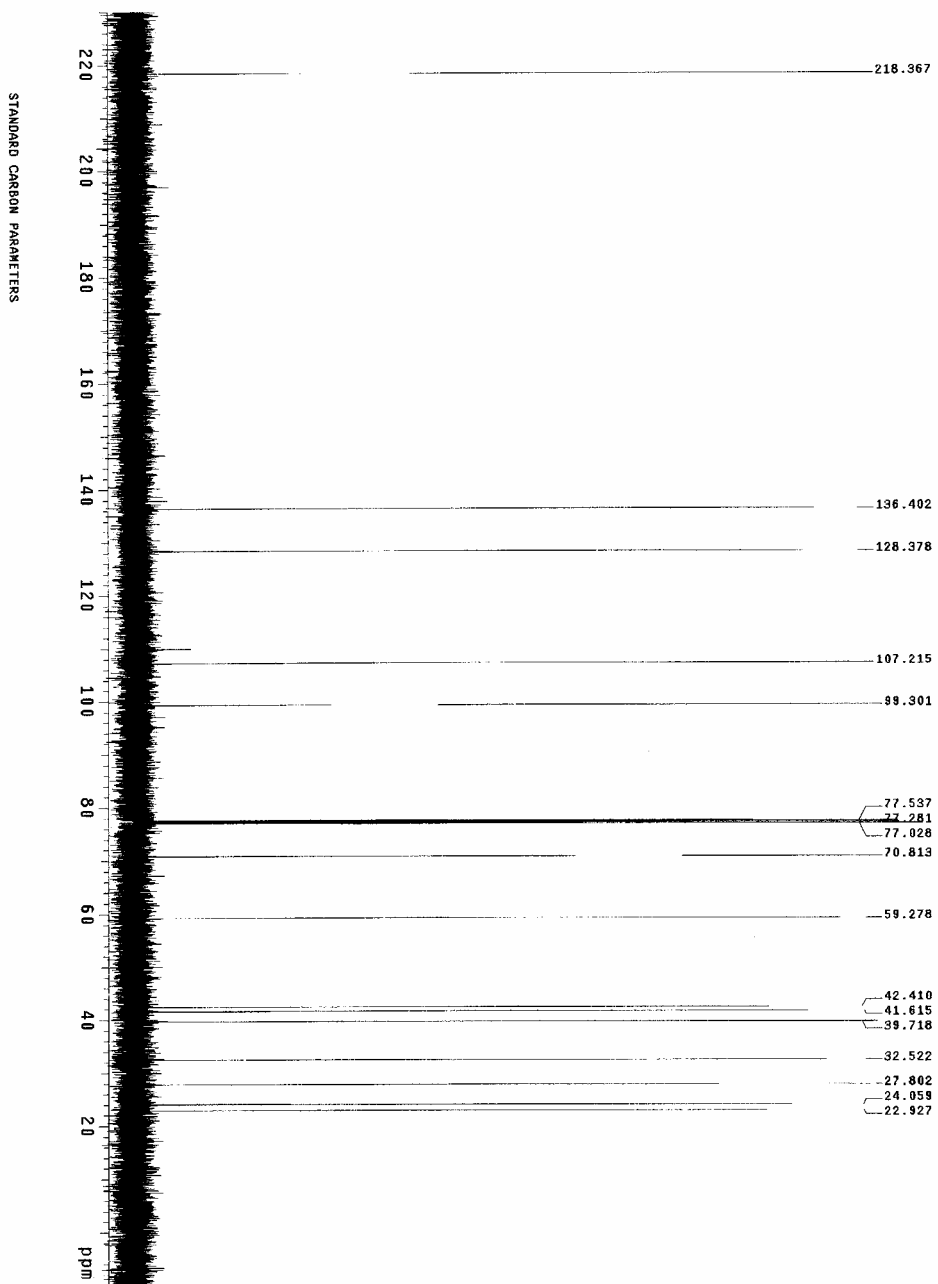

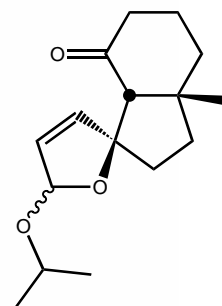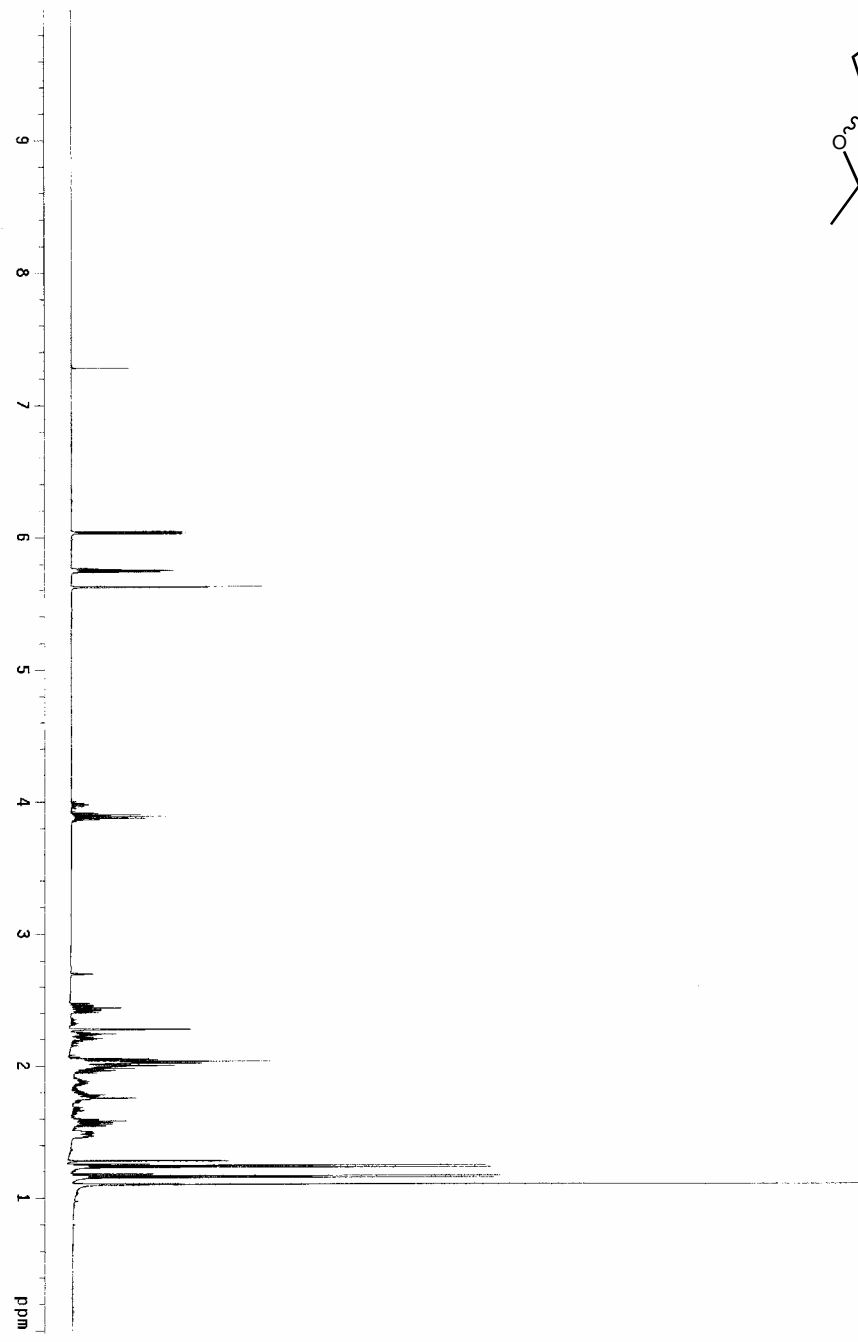

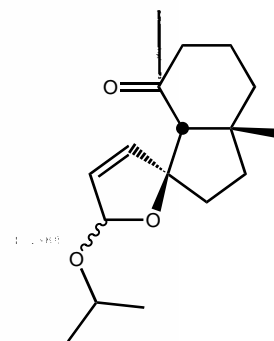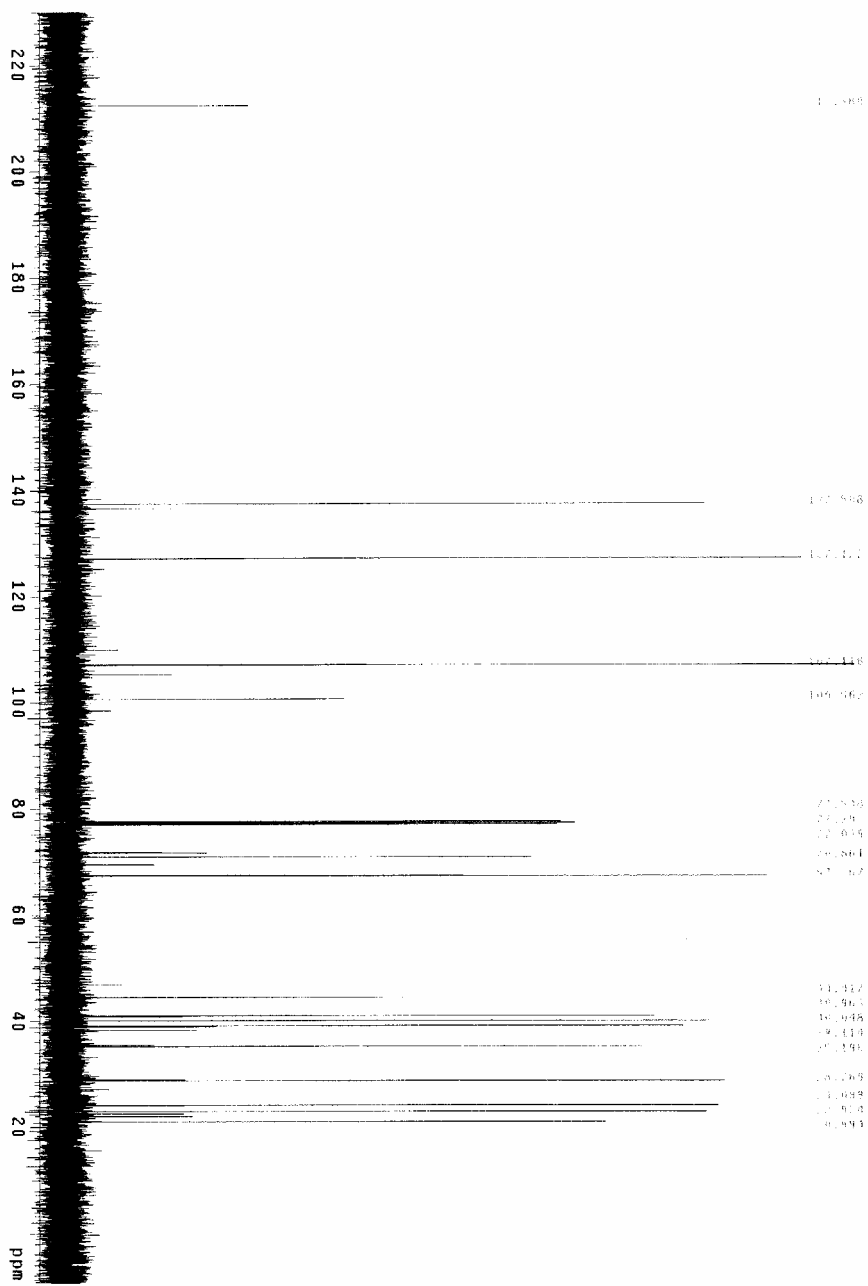

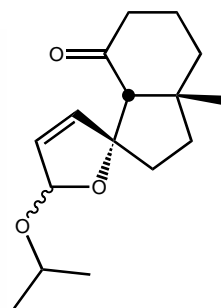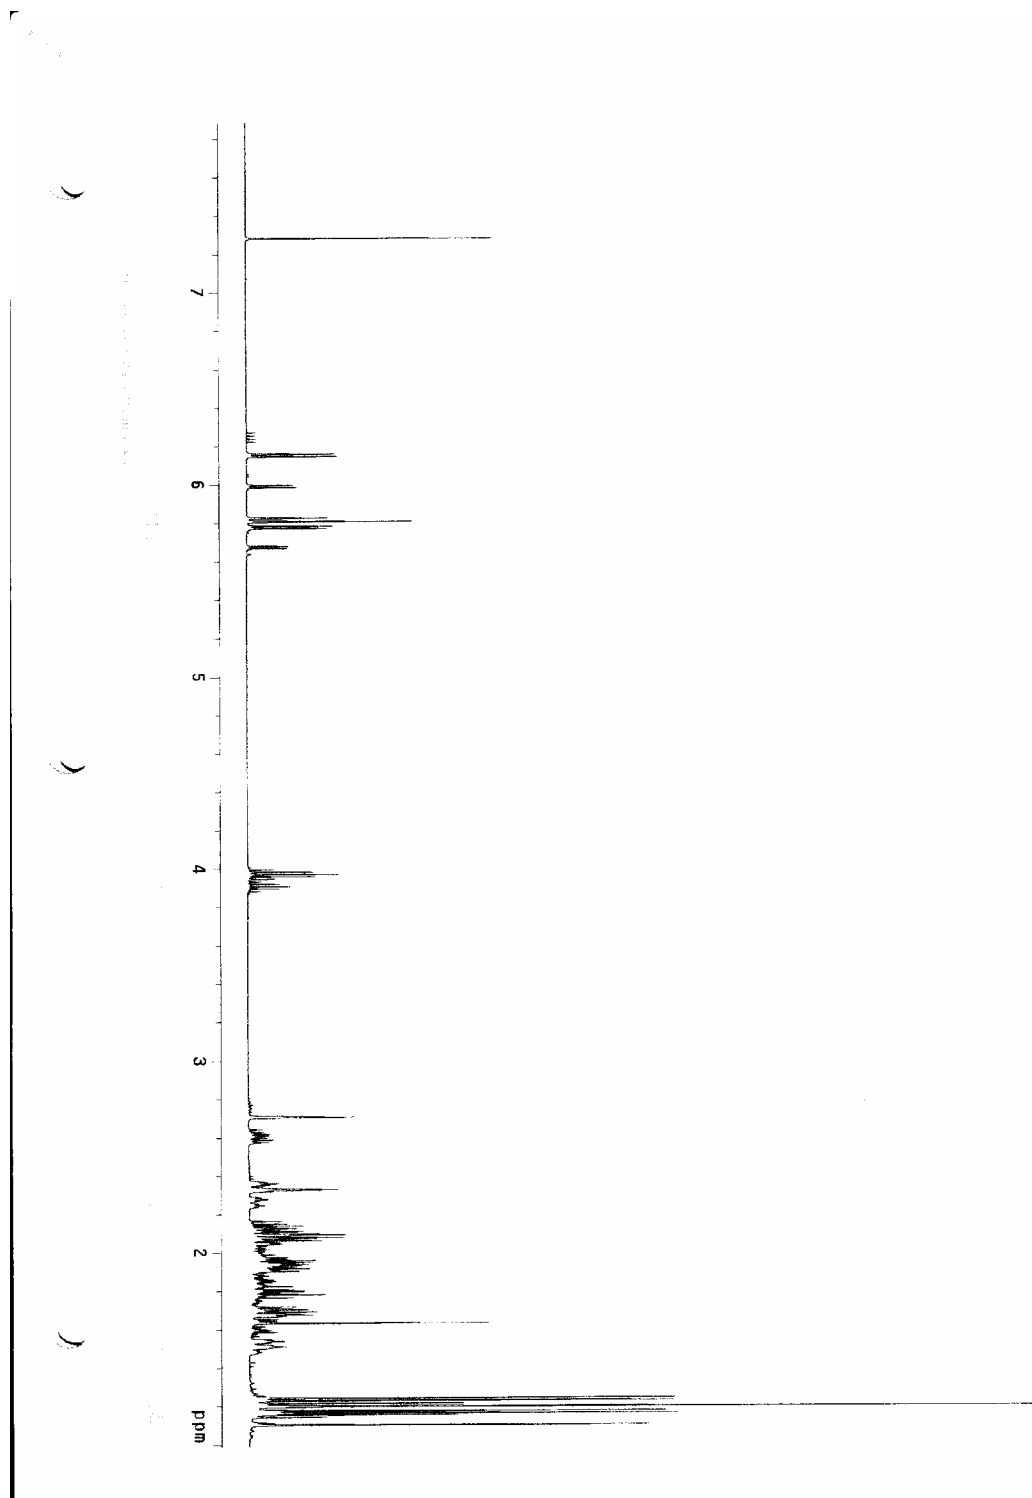

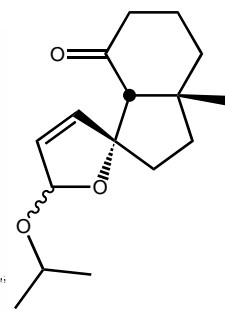

11.966

11.965

11.964

11.963

11.962

11.961

11.960

11.959

11.958

11.957

11.956

11.955

11.954

11.953

11.952

11.951

11.950

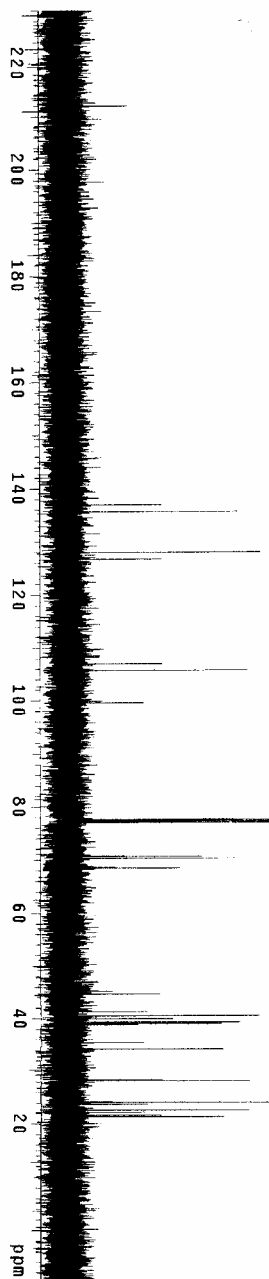

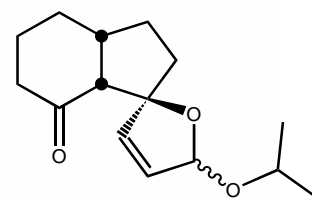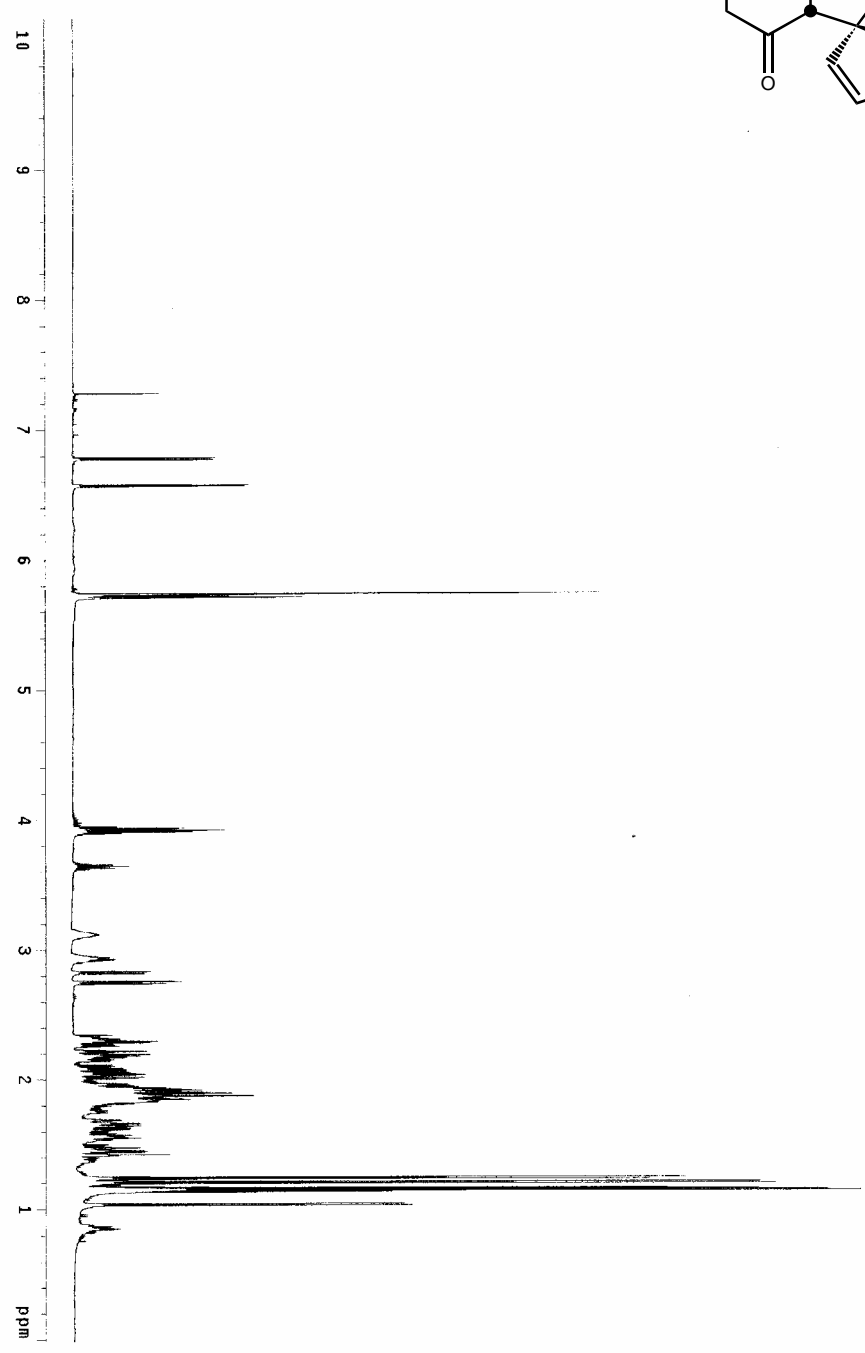

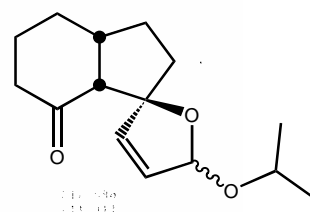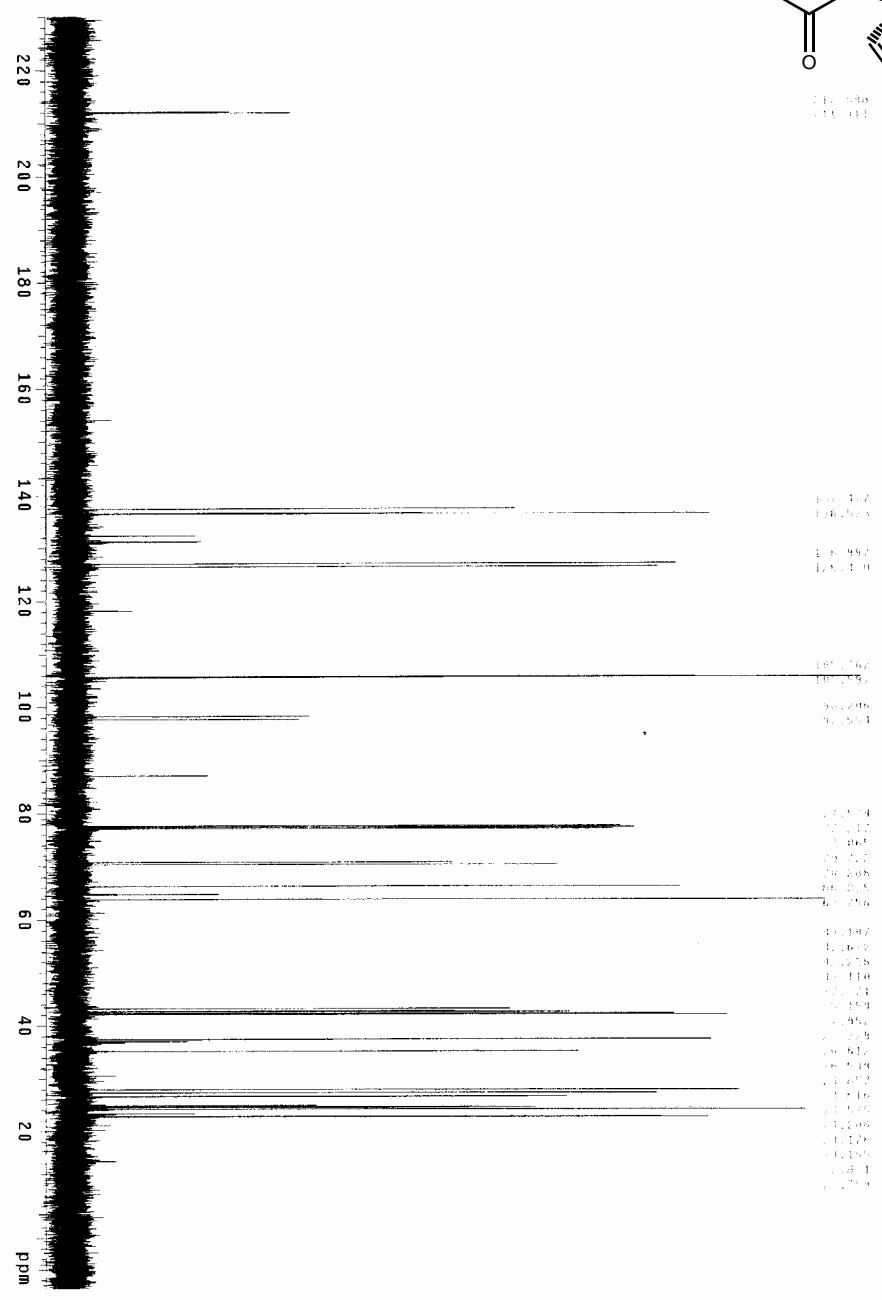

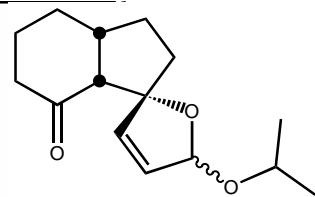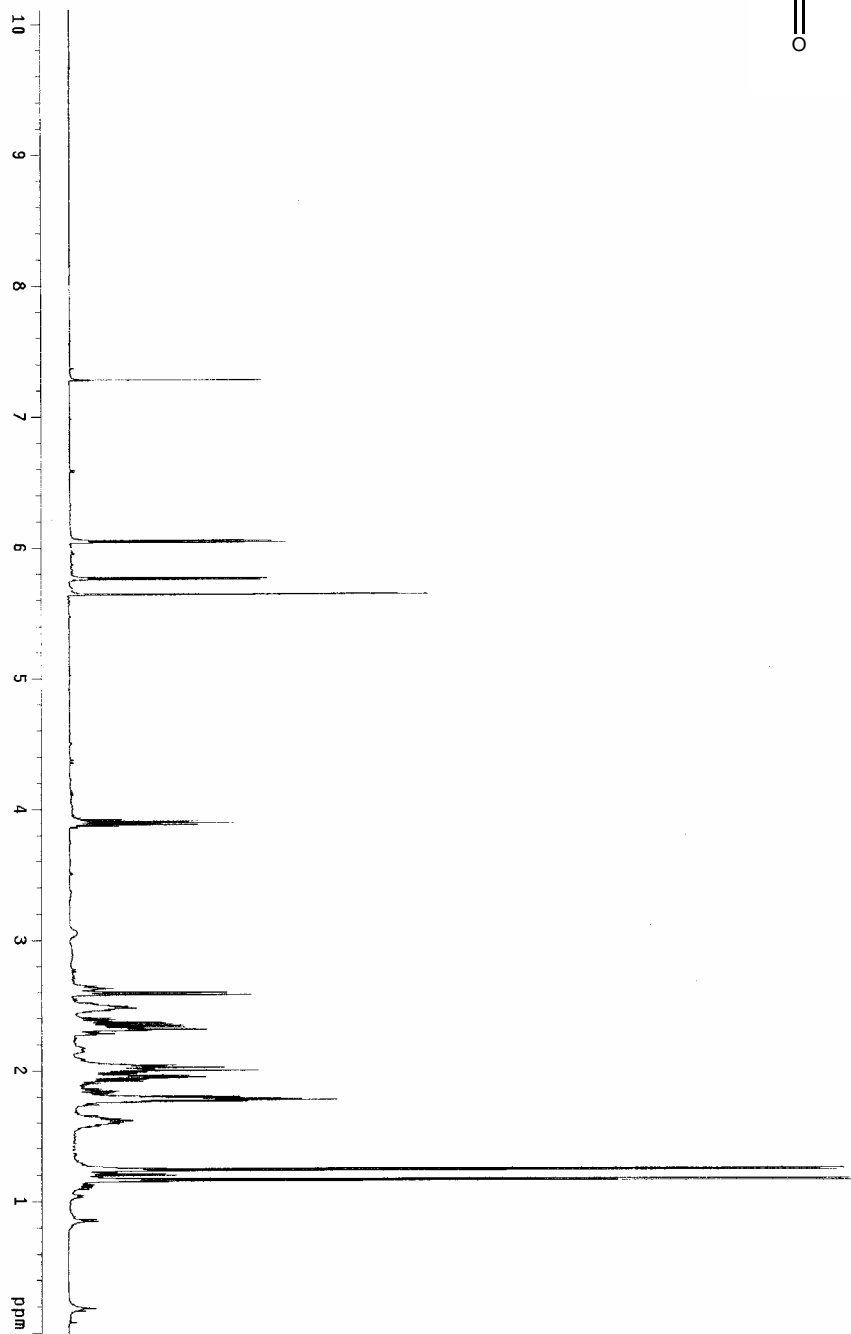



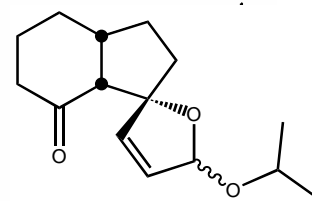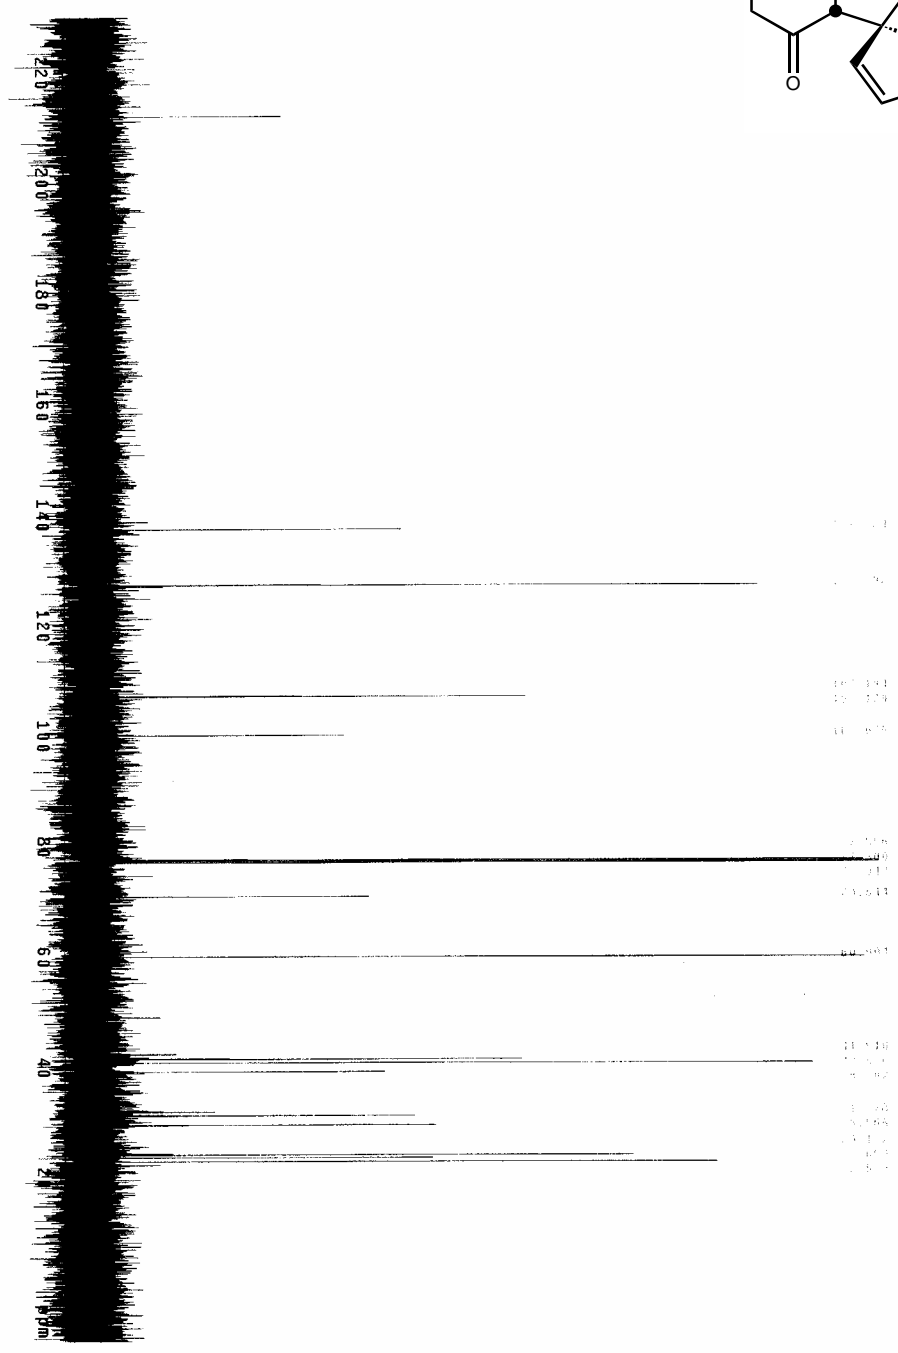

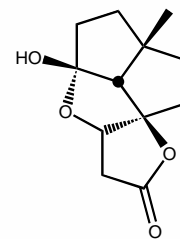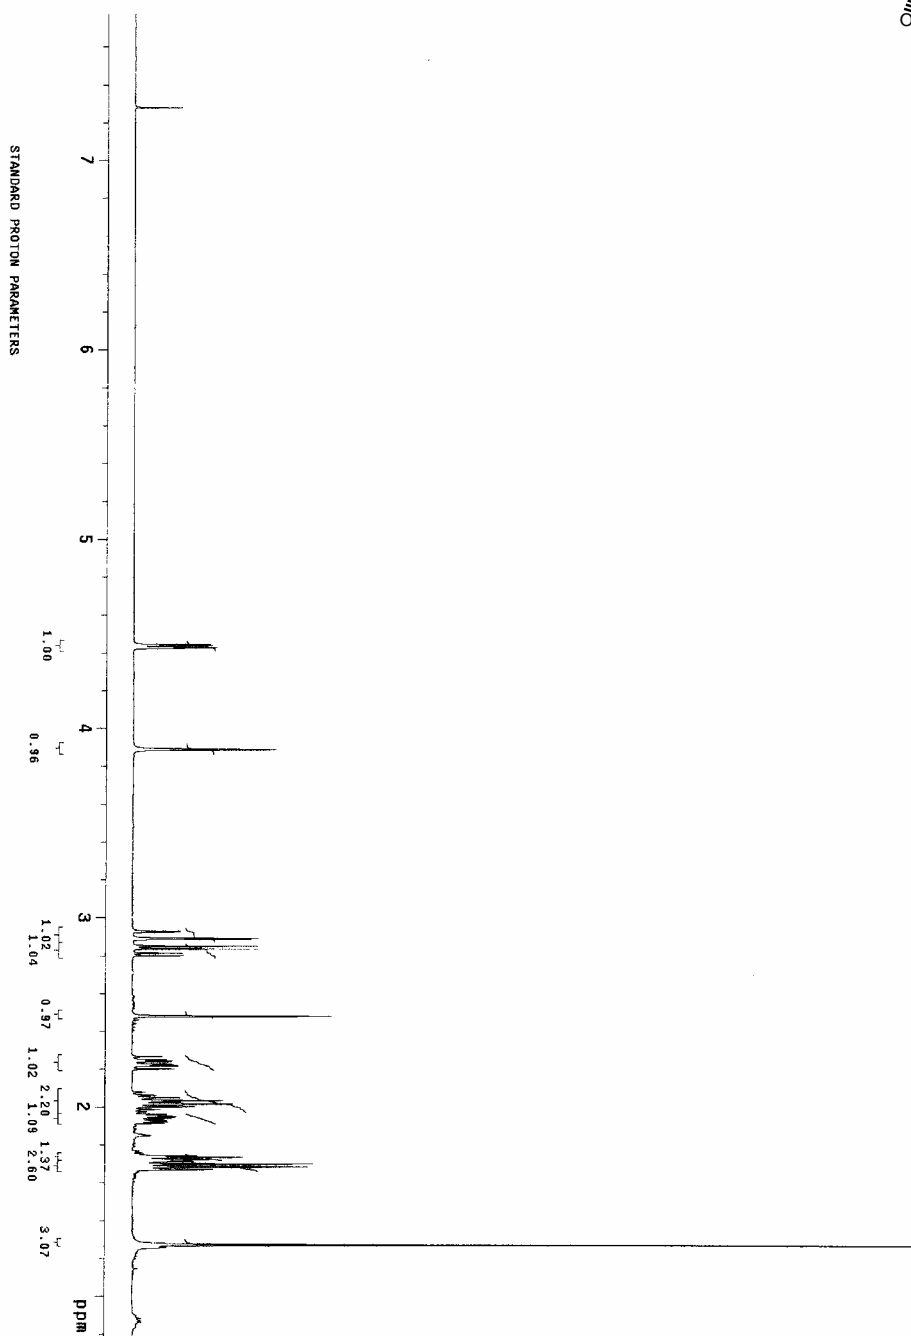

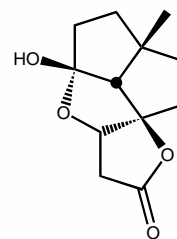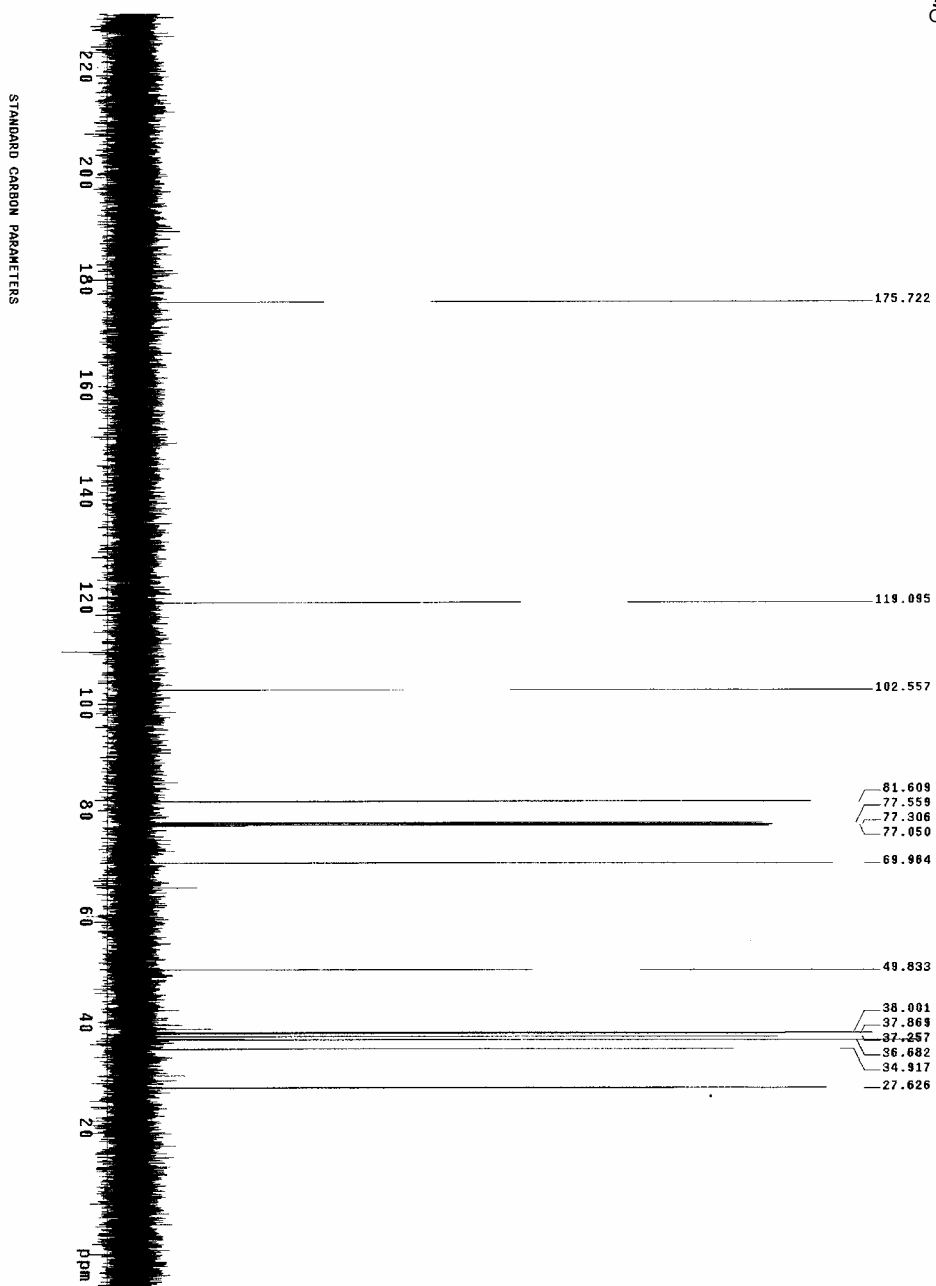

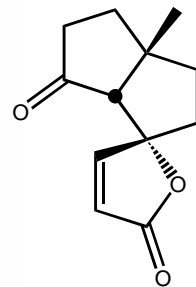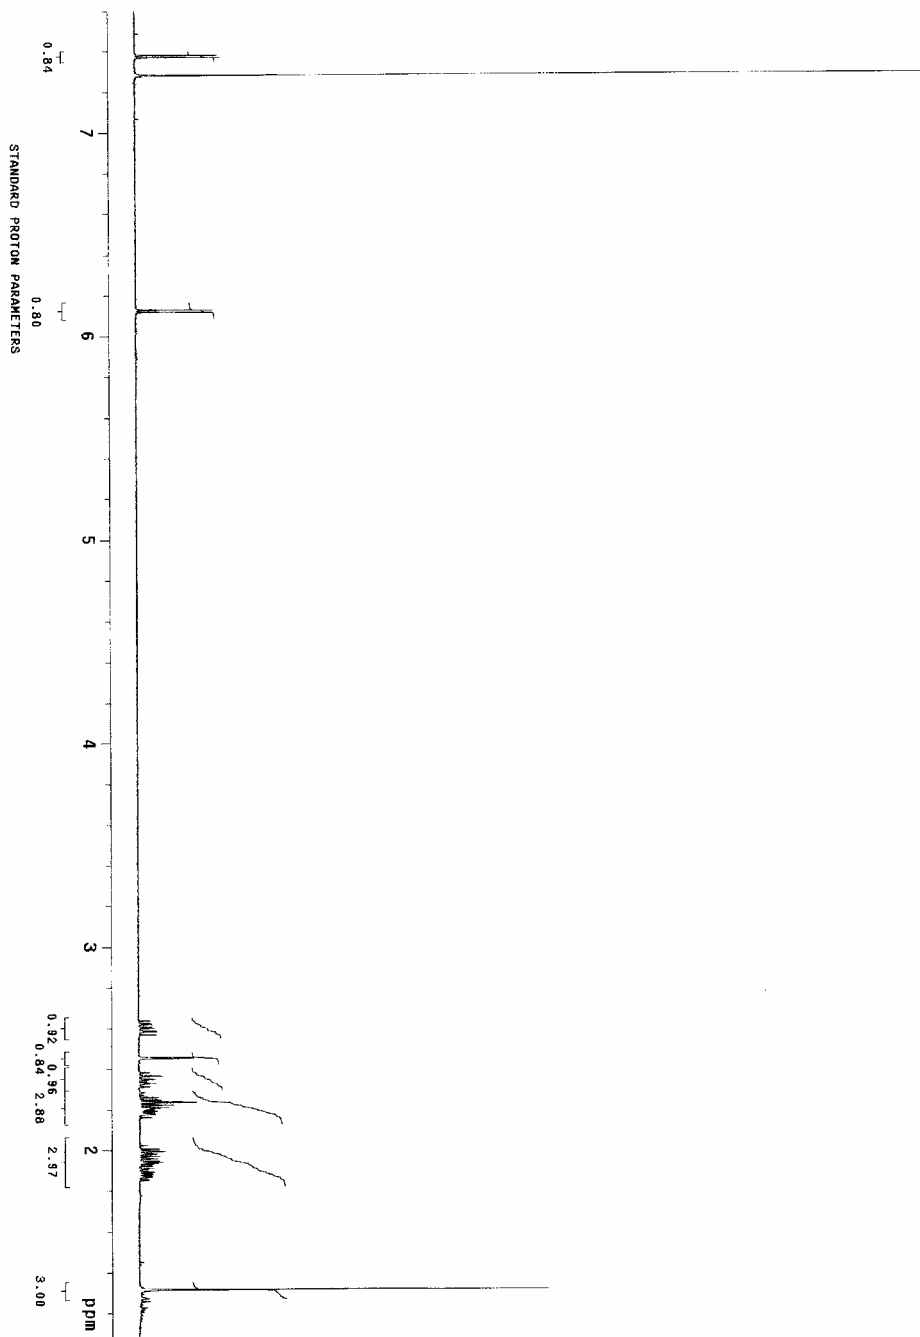

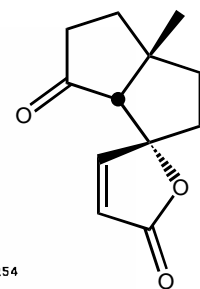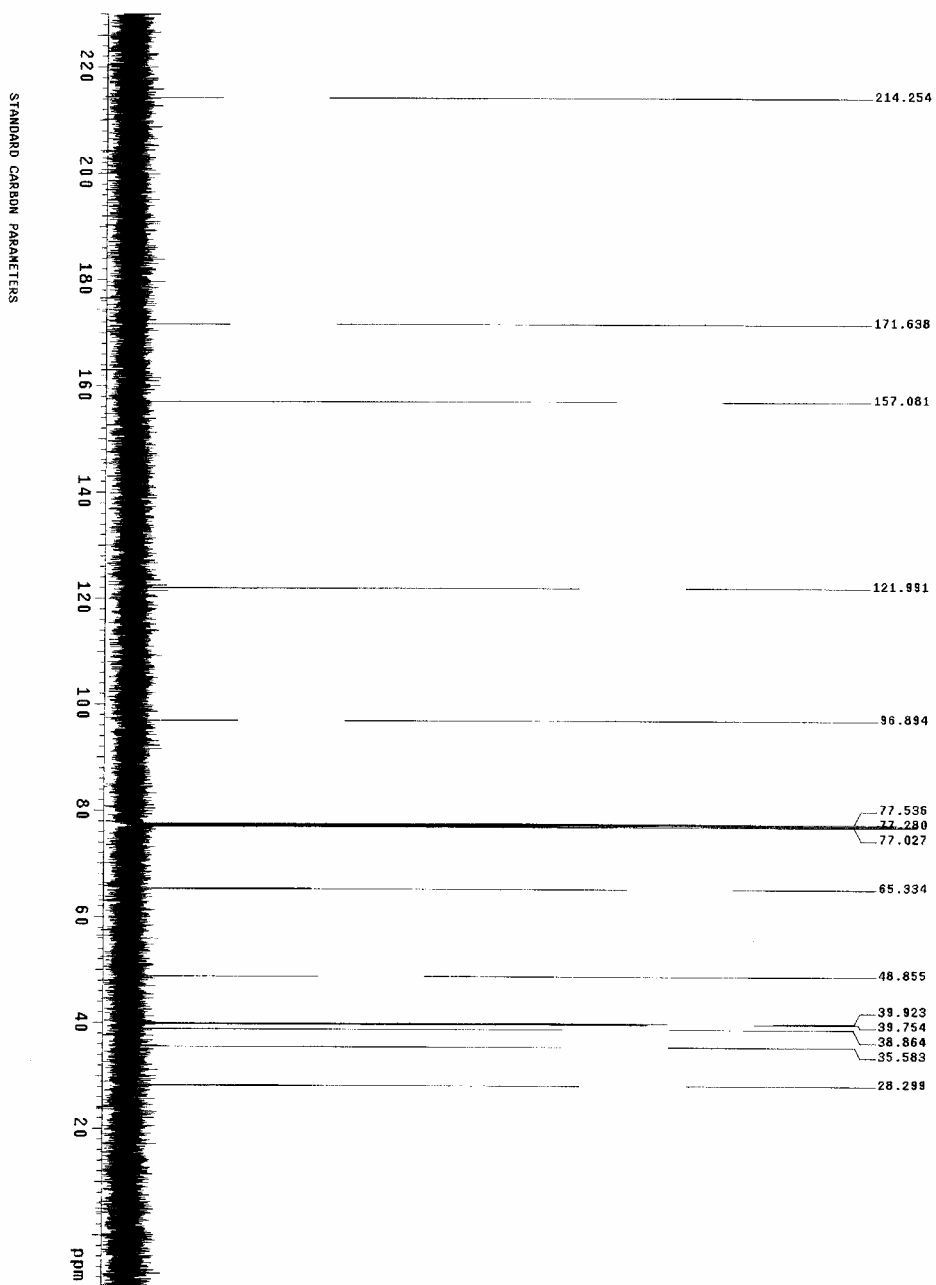

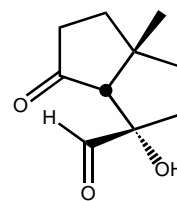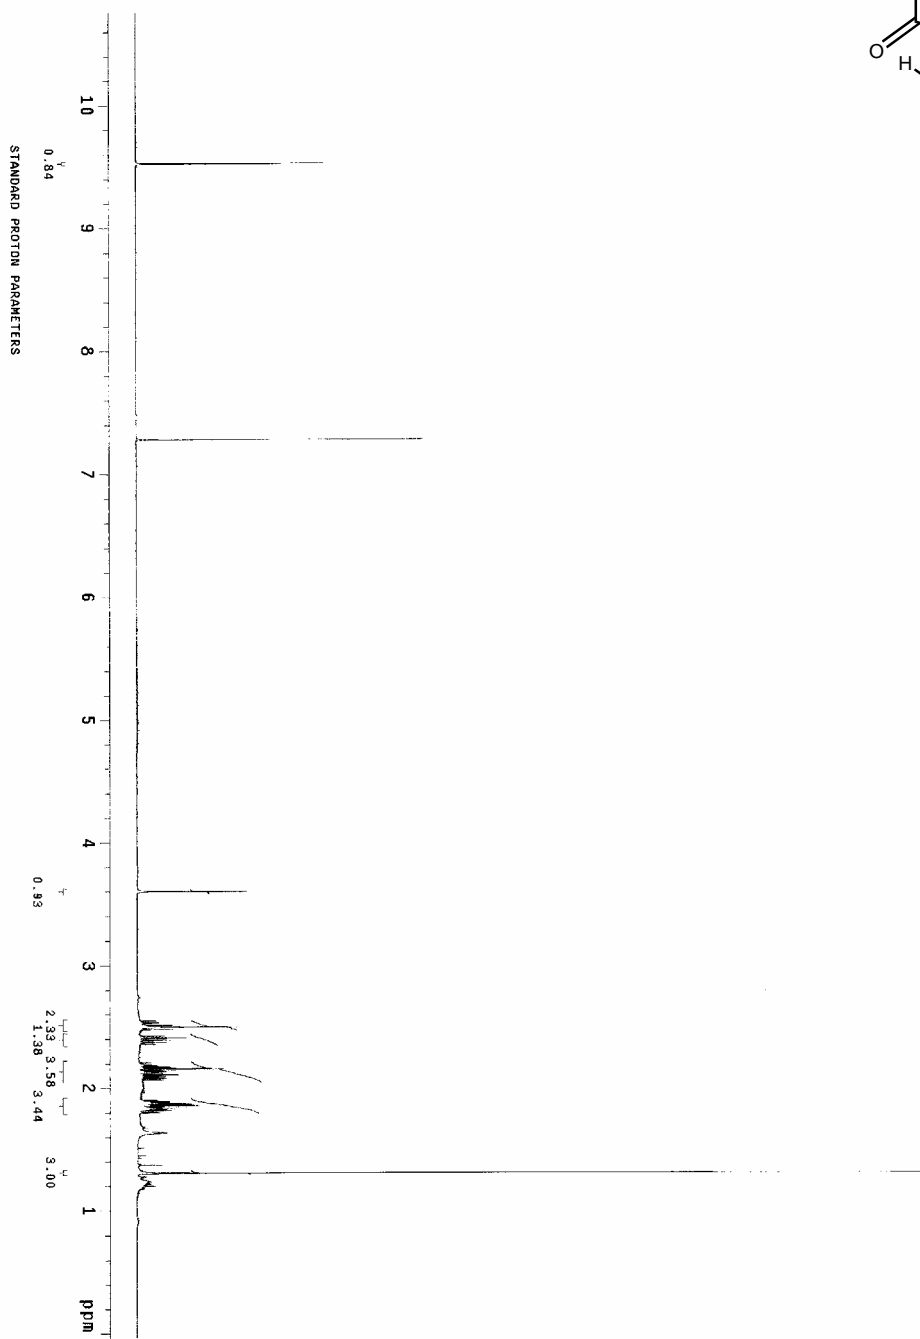

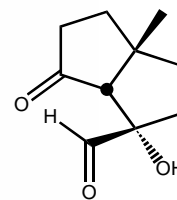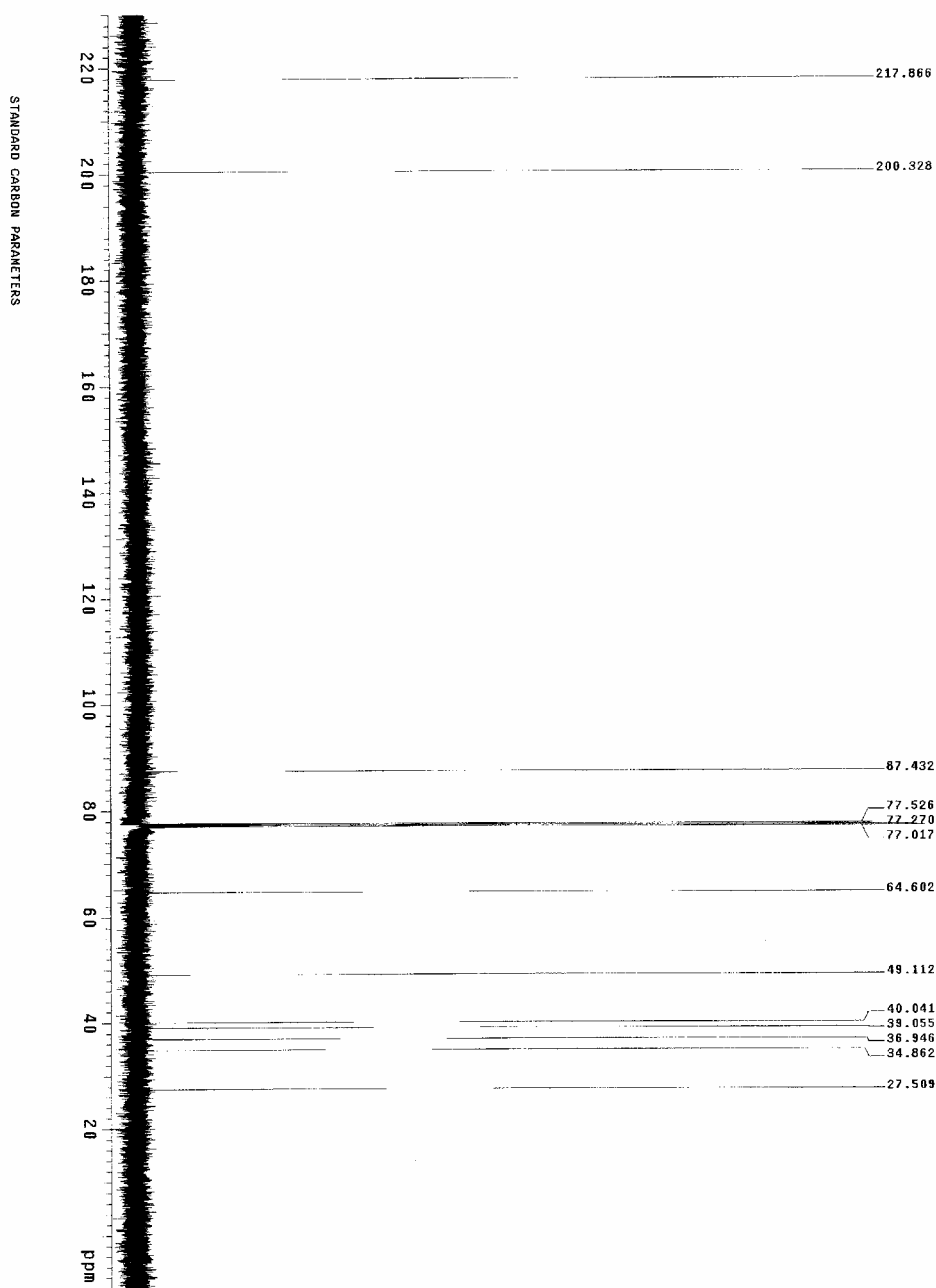

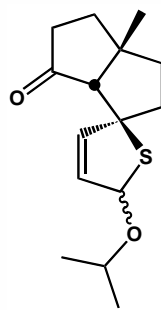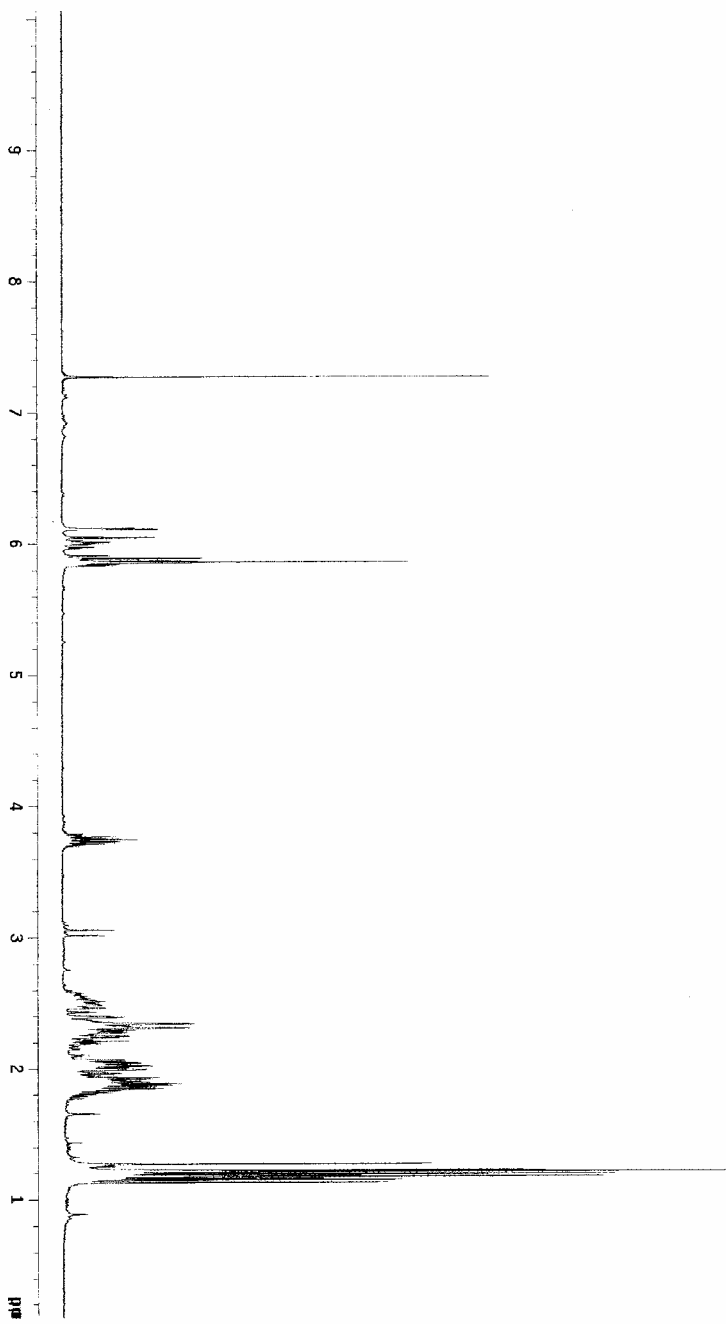

STANDARD 1H OBSERVE



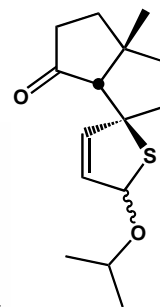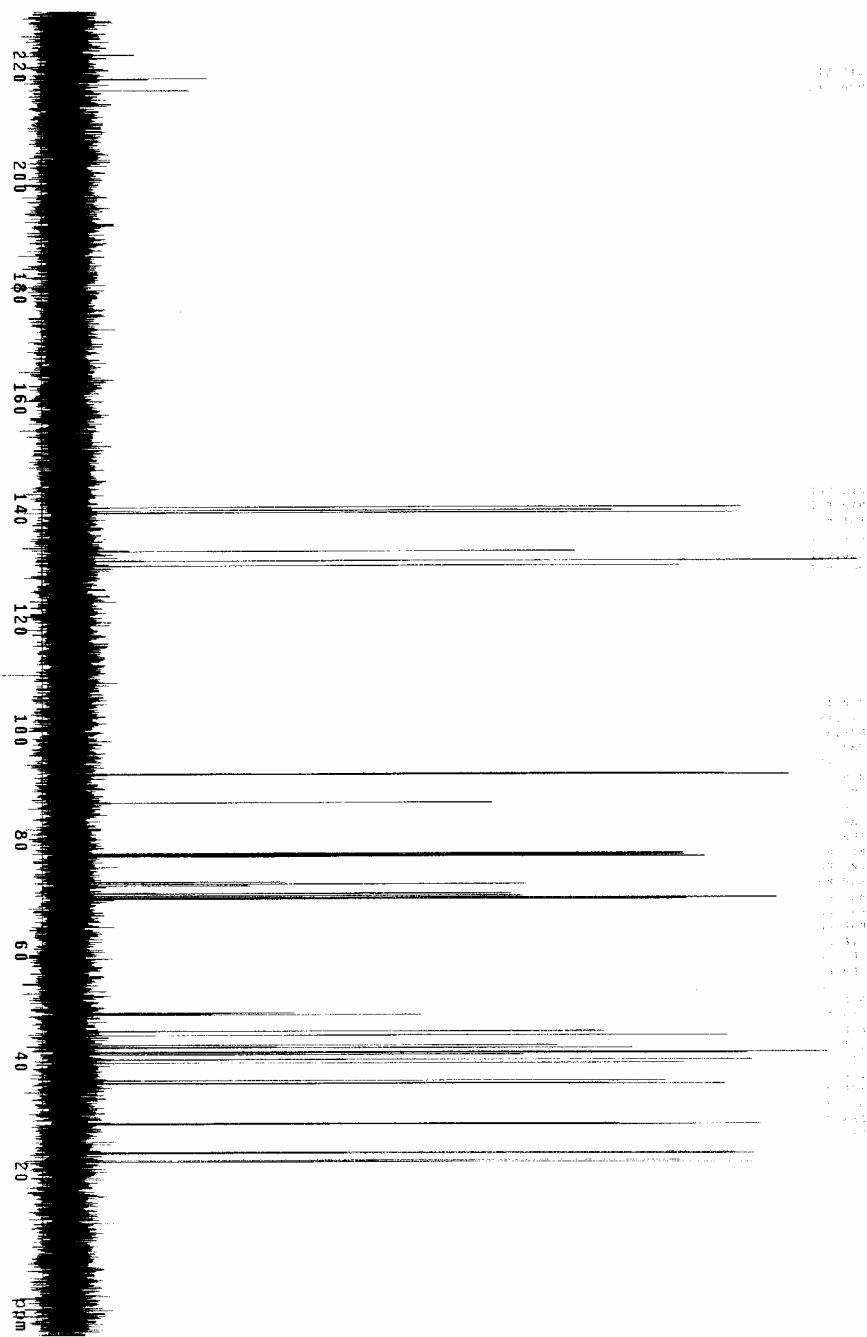

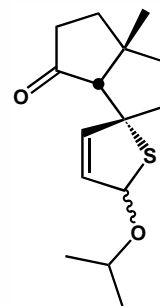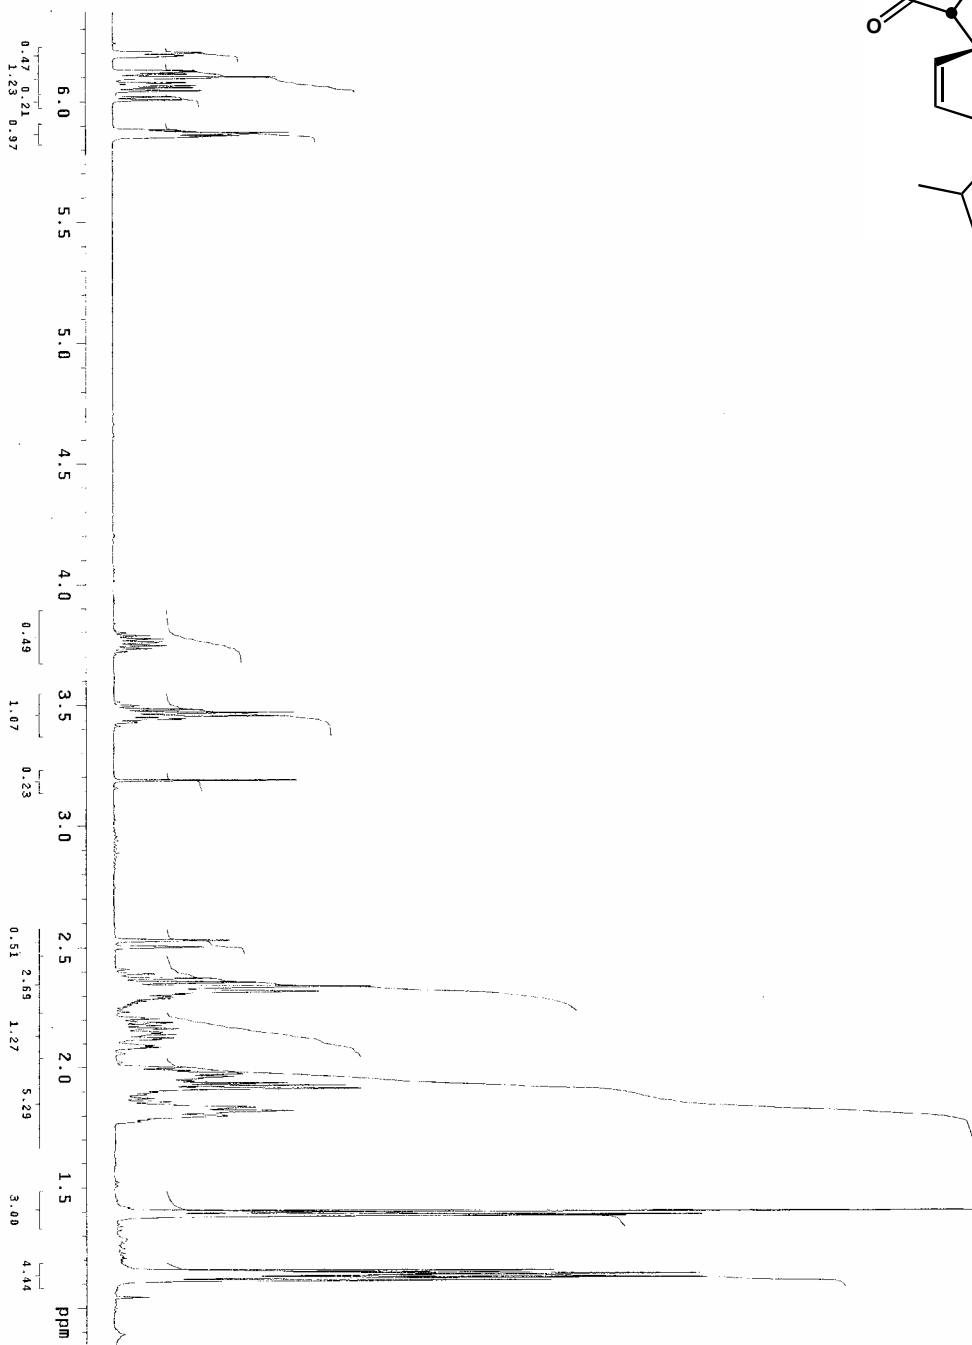

STANDARD CARBON PARAMETERS

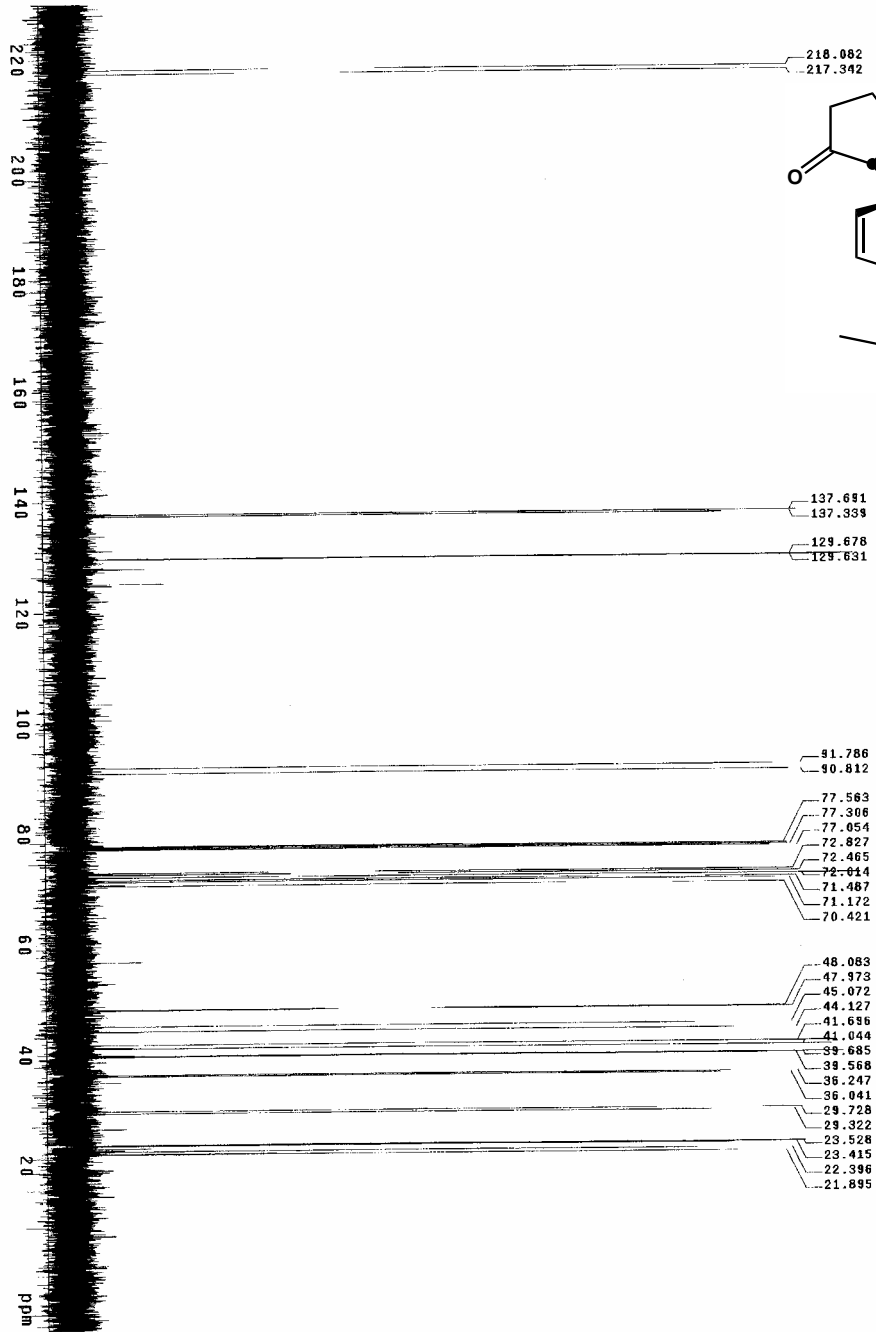

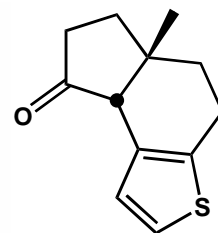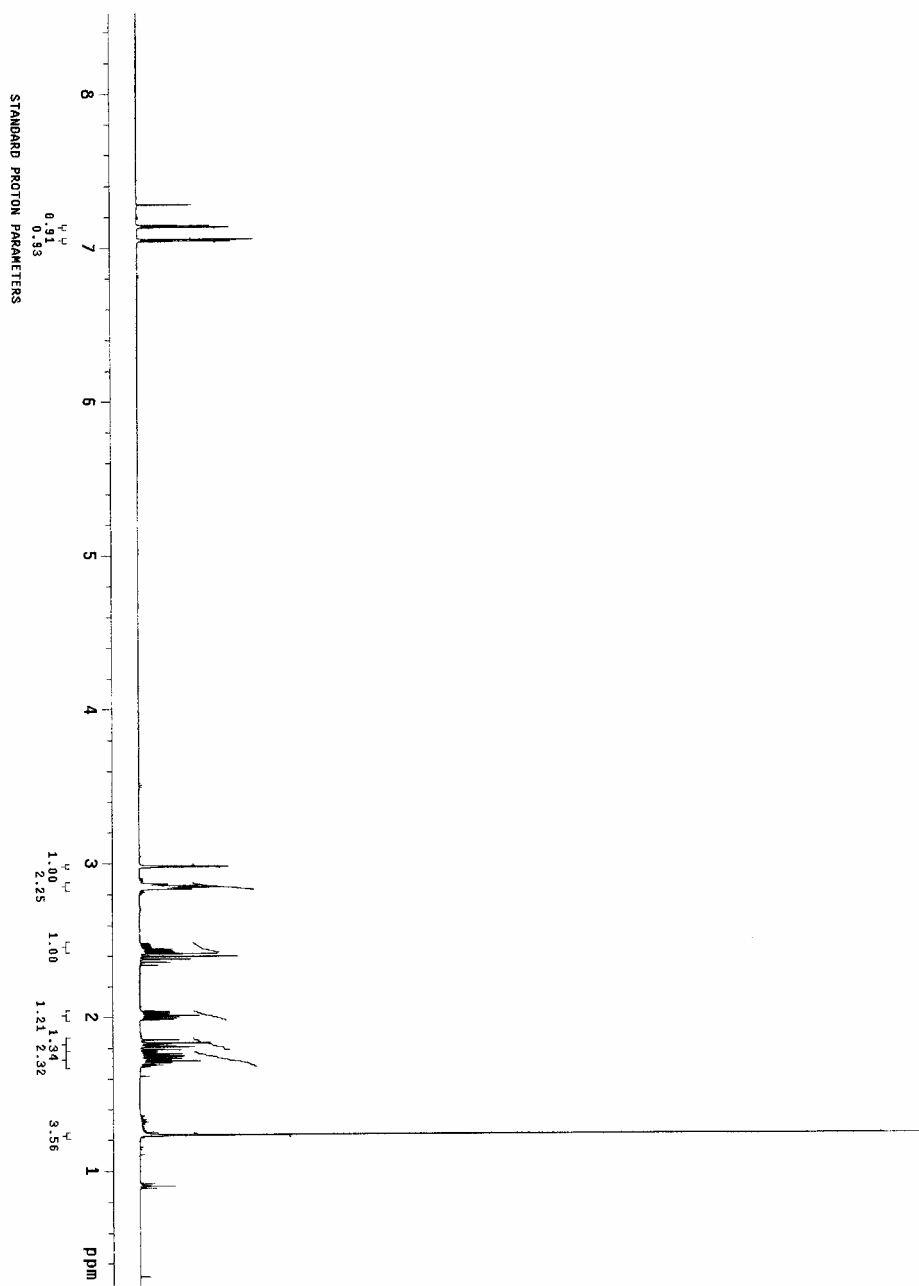

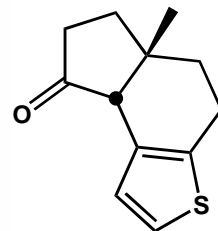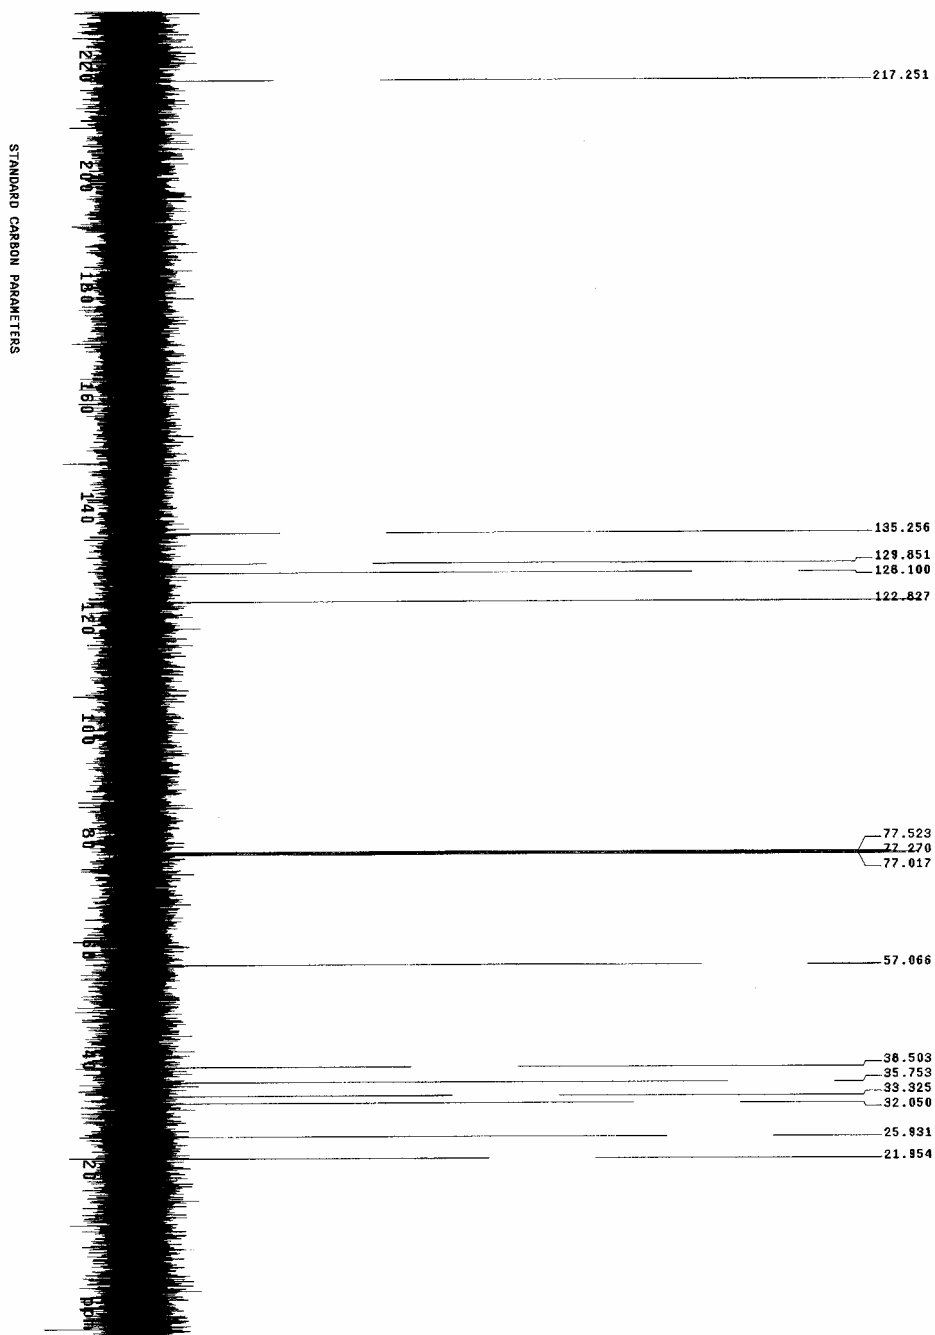

Supplement: b513532j.pdf [file b513532j.pdf]
